RESEARCH ARTICLE

# 6-Methoxyflavone targets SLC1A5 to induce ferroptosis in HeLa cells

Chaihong Zhang, Lihong Chen<sup>ID</sup>\*

Department of Obstetrics and Gynecology, Shaanxi Provincial People's Hospital, Xi'an, Shaanxi, China

\* [chenlh202403@163.com](mailto:chenlh202403@163.com)

## Abstract

### Objective

This study aimed to explore the role and molecular mechanism of 6-methoxyflavone in inducing ferroptosis in HeLa cells.

### Methods

Transmission electron microscopy (TEM), mitochondrial superoxide, and glutathione content assay were used to detect the effects of 6-methoxyflavone on ferroptosis. Tandem mass tag and parallel reaction monitoring proteomics, non-targeted and targeted metabolomics, polymerase chain reaction (qPCR), western blot, alternative splicing, new transcript, functional domain, molecular docking, non-covalent interaction, loss-of-function genetic manipulation, and mitochondrial superoxide analyses were performed to explore the molecular mechanism of 6-methoxyflavone-induced ferroptosis in HeLa cells.

### Results

6-Methoxyflavone induced ferroptosis in HeLa cells. Multi-omics, qPCR, western blot, alternative splicing, new transcript, functional domain, molecular docking, non-covalent interaction, loss-of-function genetic manipulation, and mitochondrial superoxide analyses indicated that 6-methoxyflavone induced ferroptosis in HeLa cells by upregulating the expression levels of SLC1A5 and mitochondrial superoxide. Molecular docking analyses showed that 6-methoxyflavone had the strongest affinity for SLC1A5. Non-covalent interaction analyses suggested that the interaction between 6-methoxyflavone and SLC1A5 was primarily driven by hydrophobic interactions. 6-Methoxyflavone targeted the peptide segment sequence LGPEGELLIR of SLC1A5.

### Conclusion

6-Methoxyflavone induced ferroptosis in HeLa cells by markedly altering ferroptosis-related genes, proteins, and metabolites expression, thereby exerting

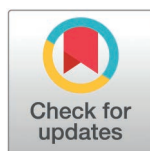

## OPEN ACCESS

**Citation:** Zhang C, Chen L (2025) 6-Methoxyflavone targets SLC1A5 to induce ferroptosis in HeLa cells. PLoS One 20(12): e0339578. <https://doi.org/10.1371/journal.pone.0339578>

**Editor:** Swati Jaiswal, UMass Chan Medical School Department of Medicine: University of Massachusetts Chan Medical School Department of Medicine, UNITED STATES OF AMERICA

**Received:** December 5, 2024

**Accepted:** December 9, 2025

**Published:** December 29, 2025

**Copyright:** © 2025 Zhang, Chen. This is an open access article distributed under the terms of the [Creative Commons Attribution License](https://creativecommons.org/licenses/by/4.0/), which permits unrestricted use, distribution, and reproduction in any medium, provided the original author and source are credited.

**Data availability statement:** All relevant data are within the manuscript and its [Supporting Information](#) files.

**Funding:** The study was supported by Postdoctoral Research Project of Shaanxi

Province of China (2023BSHGZZHQYXMZZ35). The study was supported by Science and Technology Plan Project of Xi'an City, Shaanxi Province, China (24YXYJ0155).

**Competing interests:** The authors have declared that no competing interests exist.

anti-cancer effects. The core gene responsible for the induction of ferroptosis and the upregulation of mitochondrial superoxide in HeLa cells by 6-methoxyflavone is SLC1A5.

## 1 Introduction

In 2022, the incidence and mortality rates of cervical cancer were relatively high worldwide [1]. Cervical cancer is a major health concern in women, and cervical cancer treatment is associated with many challenges. Medicinal plants are essential natural products, and drugs derived from natural products play a crucial role in cancer treatment. 6-Methoxyflavone is a small lipid-soluble molecule extracted from the Chinese herbal medicine *Imperata cylindrica* [2] and has inhibitory effects on various cancer cells, with the strongest effect on HeLa cells [3]. However, the role and mechanism of 6-methoxyflavone in HeLa cell ferroptosis remains unclear.

Ferroptosis is closely related to the growth, metastasis [4], immune cell [5], and treatment [6] of cervical cancer. Induction of cancer cell ferroptosis is a promising cancer treatment strategy [5]. Ferroptosis is a potential target for cancer treatment. Novel carbon quantum dots technology induces ferroptosis in cancer cells via antioxidant inhibition synergistic nanocatalytic activity [7]. Ropivacaine induces ferroptosis to upregulate the cisplatin-sensitivity of human colorectal cancer by the sirtuin 1 (SIRT1)/ nuclear factor erythroid 2-related factor 2 (Nrf2) pathway [8]. More and more small molecule compounds in traditional Chinese medicine have been found to exert anti-cancer effects through the ferroptosis pathway. Red ginseng polysaccharide induces ferroptosis in gastric cancer cells via the phosphatidylinositol 3-kinase (PI3K)/ protein kinase B (AKT) pathway [9]. Baicalein induces ferroptosis in colorectal cancer cells by the janus kinase 2 (JAK2)/ signal transducer and activator of transcription 3 (STAT3)/ glutathione peroxidase 4 (GPX4) pathway [10]. In our study, transmission electron microscopy imaging, mitochondrial superoxide assay, and reduced and oxidized glutathione content assay were used to detect the effects of 6-methoxyflavone on ferroptosis in HeLa cells.

An important characteristic of malignant tumors is that tumor cells undergo metabolic changes in materials and energy to adapt to various stresses [11]. Metabolic reprogramming is closely related to the malignant progression [12], immune microenvironment [13], diagnosis [14], and treatment [15] of tumors. Ferroptosis is closely associated with cancer metabolism [16] and affects cancer occurrence and progression. For example, icariin and curcumin synergistically induce autophagy and ferroptosis in prostate cancer cells, affecting lipid metabolism and exerting anticancer effects [17]. In our study, non-targeted metabolomics and targeted medical metabolomics were used to analyze differentially expressed target metabolites, and enriched pathways in HeLa cells after treatment with 6-methoxyflavone.

This study aimed to elucidate the potential role and molecular mechanism of 6-methoxyflavone in ferroptosis in HeLa cells. Tandem mass tag (TMT) proteomics, parallel reaction monitoring (PRM) proteomics, quantitative polymerase chain reaction (qPCR), western blot, alternative splicing, new transcript, functional domain,

molecular docking, and non-covalent interaction analyses were performed to explore the molecular mechanism of 6-methoxyflavone-induced ferroptosis in HeLa cells. TMT and PRM proteomics analyses indicated that 6-methoxyflavone specifically interacted with the peptide sequence LGPEGELLIR of SLC1A5. Molecular docking analysis further confirmed a high binding affinity between 6-methoxyflavone and SLC1A5. Additionally, non-covalent interaction analysis suggested that the interaction between 6-methoxyflavone and SLC1A5 was primarily driven by hydrophobic interactions. Finally, TMT proteomics analysis showed that 6-methoxyflavone exerted effects on alternative splicing types, new transcript, and functional domain of SLC1A5.

## 2 Materials and methods

### 2.1 HeLa cells and 6-methoxyflavone

The human cervical adenocarcinoma HeLa cell line was obtained from Peking Union Medical College (Beijing, China). Fetal bovine serum (10%) was added to Dulbecco's modified Eagle medium (HyClone, Logan, UT, USA) to culture HeLa cells. 6-Methoxyflavone extraction and purification were performed by Weikey Biotech (Chengdu, Sichuan, China). The 6-methoxyflavone powder was dissolved in dimethyl sulfoxide (DMSO) using ultrasound to prepare the stock solution.

### 2.2 Ethics statement

Our study did not involve research pertaining to human participants and did not include any human participants or human participants' data. Our study did not encompass research related to animals and did not incorporate any data from animal participants.

### 2.3 Cell proliferation and toxicity assay

Single-cell suspensions were seeded in 96-well plates for 24 hours. Subsequently, the HeLa cells were treated with five concentrations of 6-methoxyflavone (0.16% DMSO, 20  $\mu$ M, 40  $\mu$ M, 80  $\mu$ M, and 100  $\mu$ M) for 24 and 48 hours. Following this, the cell counting kit 8 (CCK8) (MeilunBio, Dalian, Liaoning, China) was used to assess the toxicity of 6-methoxyflavone on HeLa cells. The optical density values were detected at 450 nm using a microplate reader MB580 (Huisong Heales, Shenzhen, Guangdong, China). The half-maximal inhibitory concentration (IC<sub>50</sub>) values were calculated using GraphPad Prism software ([www.graphpad.com](http://www.graphpad.com)).

### 2.4 Mitochondrial superoxide assay

HeLa cells were cultured in six-well plates for 24 hours. Four concentrations (0.16% DMSO, 16.25  $\mu$ M, 32.5  $\mu$ M, and 65  $\mu$ M) of 6-methoxyflavone were added to the complete medium and incubated for 48 hours. According to the manufacturer's instructions, mSoxUp (Beyotime, Shanghai, China) was a positive control for inducing mitochondrial superoxide production in HeLa cells. 2 mL of mSoxUp working solution was added to each well and incubated for four hours at 37°C. MitoSOX Red (C43H43IN3P) fluorescence probe (Beyotime) was used to detect the percentage of HeLa cells in the different fluorescence intensity. According to the protocol, 500  $\mu$ L of MitoSOX Red working solution was added to each sample tube and incubated for 30 minutes at 37°C. A flow cytometer Accuri™ C6 (BD Biosciences, San Jose, CA, USA) was used to detect the fluorescence intensity in the FL2 channel. FlowJo 10.8.1 (TreeStar, Ashland, CA, USA) and GraphPad Prism were used to analyze the fluorescence data.

### 2.5 Cell transfection and mitochondrial superoxide assay

HeLa cells were cultured in six-well plates for 24 hours. The culture medium was switched to a reduced serum medium (Gibco, Burlington, Canada). ASNS short hairpin RNA (shRNA) interference plasmid, SLC1A5 shRNA, and negative control shRNA (Genepharma, Shanghai, China) vectors were transfected into HeLa cells using Lipo8000 reagent (Beyotime)

according to the instructions. All vectors contained the green fluorescent protein (GFP). After six hours, the medium was switched to a complete medium. After 24 hours, the HeLa cells were digested and collected for quantitative polymerase chain reaction (qPCR) analysis to detect transfection efficiency. The transfected cells were treated with 0.16% DMSO and 32.5  $\mu$ M 6-methoxyflavone for 24 hours. The treated cells were collected for mitochondrial superoxide assay. The assay included two control groups: MitoSOX Red single fluorescence group of untreated HeLa cells, and GFP single fluorescence group of HeLa cells transfected with negative control shRNA. According to the protocol, 500  $\mu$ L of MitoSOX Red working solution was added to each sample tube. A flow cytometer Accuri™ C6 was used to detect the fluorescence intensity in the FL1 and FL2 channels. FlowJo 10.8.1 and GraphPad Prism were used to analyze the fluorescence data.

## 2.6 TMT proteomic, non-targeted metabolomic, and targeted medical metabolomic analyses

The cells were collected to obtain samples after 48 hours of treatment with 0.16% DMSO or 65  $\mu$ M 6-methoxyflavone. The treated cells were subjected to total protein or metabolite extraction, quality control, tandem mass tag (TMT; Thermo Fisher Scientific, Madison, WI, USA) proteomic, and non-targeted and targeted metabolomic analyses at Applied Protein Technology Biological (Shanghai, China). The TMT proteomic analysis was performed on a Q Exactive Orbitrap mass spectrometer (Thermo Fisher Scientific) that was coupled to Easy nLC chromatograph (Thermo Fisher Scientific) for 60 minutes. The raw data generated from mass spectrometry analyses are stored in RAW files. The Mascot software (<https://www.matrixscience.com/>) and Proteome Discoverer software (Thermo Fisher Scientific) were employed for the identification of inventory and for conducting quantitative analyses. The TMT proteome detection includes three control group and three treatment group cell samples. A criterion with a fold change  $> 1.2$  or  $< 0.84$  and  $p < 0.05$  was used to screen for significantly differentially expressed proteins. The proteins underwent Gene Ontology (GO) [18] analysis utilizing Blast2Go (<https://www.blast2go.com/>) software [19]. Differentially expressed GO biological processes were identified with a significance level of  $p < 0.05$ . The non-targeted metabolomic analysis was performed on a Q Exactive Orbitrap mass spectrometer (Thermo Fisher Scientific) that was coupled to Vanquish UHPLC chromatograph (Thermo Fisher Scientific) for 12 minutes. The raw data generated from mass spectrometry analyses are stored in RAW files. The RAW files were converted into mzXML files by ProteoWizard software (<https://proteowizard.sourceforge.io/>). Peak alignment, retention time correction, and peak area extraction were conducted utilizing XCMS software (<https://sciex.com/cl/products/software>). Collection of Algorithms of METabolite pProfile Annotation was used for annotation of isotopes and adducts. The targeted metabolomic analysis was performed on a QTRAP 6500+ mass spectrometer (AB Sciex, Pte. Ltd., USA) that was coupled to 1290 Infinity chromatograph (Agilent Technologies, Inc. Winooski, VT, USA) for 15 or 22 minutes. MultiQuant or Analyst software (<https://sciex.com/cl/products/software>) was utilized to extract peaks from the raw data files, determine the peak areas of each metabolite, and calculate the metabolite concentrations based on the standard curve. Both non-targeted and targeted metabolomics detection include six control group and six treatment group cell samples. A criterion with variable importance for the projection (VIP) of orthogonal partial least squares discriminant analysis  $> 1$  and  $p < 0.05$  was used to screen for significantly differentially expressed non-targeted metabolites. A criterion with a fold change  $> 1.6$  or  $< 0.63$  and  $p < 0.05$  was used to screen for significantly differentially expressed targeted metabolites. The metabolites were subjected to Kyoto Encyclopedia of Genes and Genomes (KEGG) analysis [20]. Differential KEGG pathways were identified at  $p < 0.05$ .

## 2.7 Observation of subcellular ultrastructure using transmission electron microscopy

HeLa cells were treated with 6-methoxyflavone similar to the cells used in the multi-omics analyses. These cells were produced as epoxy resin blocks and ultrathin sections. After staining with uranyl acetate and lead citrate, a transmission electron microscope HT7700 (Hitachi High-Tech, Tokyo, Japan) was used to observe the subcellular ultrastructure of the cells.

## 2.8 Differentially expressed metabolites related to ferroptosis

A list of metabolites related to ferroptosis was downloaded from the hsa04216 ferroptosis metabolic pathway in the KEGG official website (<https://www.genome.jp/entry/pathway+hsa04216>), and the expression data of ferroptosis-related metabolites was extracted from the non-targeted and targeted metabolomics data.

## 2.9 Reduced and oxidized glutathione content assay

HeLa cells were treated with 6-methoxyflavone similar to the cells used in the mitochondrial superoxide assay. The reduced and oxidized glutathione content assay kits were obtained from Boxbio Science & Technology (Beijing, China). Reduced glutathione (GSH, 10 mg/mL) and oxidized glutathione (GSSG, 10 mg/mL) were utilized as standard substances. GSH: The treated cells (20  $\mu$ L) were added in a 180  $\mu$ L mixture containing 140  $\mu$ L reagent 2 and 40  $\mu$ L reagent 3. After two minutes of incubation, the optical density values were detected at 405 nm using a microplate reader MB580. GSSG: The treated cells (20  $\mu$ L) were added in a 182  $\mu$ L mixture containing 140  $\mu$ L reagent 3, 20  $\mu$ L reagent 4, 20  $\mu$ L reagent 5, and 2  $\mu$ L reagent 6. After 150 seconds of incubation, the optical density values were detected at 405 nm using a microplate reader MB580.

## 2.10 Cell apoptosis assay

The HeLa cells were treated with four concentrations of 6-methoxyflavone (0.16% DMSO, 16.25  $\mu$ M, 32.5  $\mu$ M, and 65  $\mu$ M) for 48 hours. An annexin V-allophycocyanin (APC)/ propidium iodide (PI) apoptosis detection kit (BioLegend, San Diego, CA, USA) was used to detect and count the percentage of the apoptotic HeLa cells. The collected cells were suspended in a 315  $\mu$ L buffer containing 5  $\mu$ L of annexin V-APC and 10  $\mu$ L of PI. After 15 minutes of incubation, the cells were detected by a flow cytometer Accuri™ C6 (BD Biosciences, San Jose, CA, USA). FlowJo 10.8.1 (TreeStar, Ashland, CA, USA) (<https://www.flowjo.com/>) was used to calculate the percentage of the apoptotic HeLa cells.

## 2.11 Quantitative polymerase chain reaction

A list of ferroptosis-related genes was downloaded from the FerrDb database [21]. The expression data of ferroptosis-related proteins was obtained from the TMT proteome, and a list of differentially expressed ferroptosis-related proteins was acquired. Another list of ferroptosis-related genes was downloaded from the KEGG official website (<https://www.genome.jp/entry/pathway+hsa04216>). The coding genes of differentially expressed proteins in the TMT proteome should be intersected with the two specified gene lists individually. These ferroptosis-related intersection genes were analyzed for their expression levels by quantitative polymerase chain reaction (qPCR). HeLa cells were treated with 0.16% DMSO or 32.5  $\mu$ M 6-methoxyflavone for 48 hours. Total RNA was extracted from treated cells using centrifugal column RNA extraction kit (Beyotime). The complementary DNA was obtained by Evo M-MLV reverse transcription premixed kit (Agbio, Changsha, Hunan, China). Real-time qPCR was performed using the SYBR Green Pro Taq HS premixed qPCR kit (Agbio) and the real-time qPCR system TL988 (Tianlong, Xi'an, Shaanxi, China). Glyceraldehyde 3 phosphate dehydrogenase (GAPDH) (Sangon Biotech, Shanghai, China) was used as housekeeping gene. The Delta-Delta Ct method was used to analyze the qPCR data. The qPCR primer sequences are listed in [Table 1](#).

## 2.12 Western blot analysis

The HeLa cells were treated with three concentrations of 6-methoxyflavone (0.16% DMSO, 32.5  $\mu$ M, and 65  $\mu$ M) for 48 hours. The treated cells were lysed for 30 minutes in lysis buffer (Beyotime). A bicinchoninic acid protein assay kit (Beyotime) was used to measure protein concentrations. Protein lysates were separated by 12 wells polyacryl amide gel electrophoresis (GenScript, Nanjing, Jiangsu, China) and transferred onto 0.22  $\mu$ m polyvinylidene fluoride membranes (PALL, New York, NY, USA).

**Table 1. The forward and reverse primer sequences for PCR.**

| Primers (human)                                                 | forward                   | reverse                   |
|-----------------------------------------------------------------|---------------------------|---------------------------|
| Acyl-CoA synthetase long chain family member 4 (ACSL4)          | CATCCCTGGAGCAGA-TACTCT    | TCACTTAGGATTTC-CCTGGTCC   |
| Albumin (ALB)                                                   | TGCAACTCTTCGT-GAAACCTATG  | ACATCAACCTCTG-GTCTCACC    |
| Arachidonate 15-lipoxygenase (ALOX15)                           | GGGCAAGGAGA-CAGAACTCAA    | CAGCGGTAACAAG-GGAACCT     |
| Asparagine synthetase (glutamine-hydrolyzing) (ASNS)            | GGAAGACAGC-CCCGATTTACT    | AGCACGAACT-GTTGTAATGTCA   |
| Aurora kinase A (AURKA)                                         | GAGGTCCAAAACGT-GTTCTCG    | ACAGGATGAGGTA-CACTGGTTG   |
| Capping actin protein, gelsolin like (CAPG)                     | AGTCAGCATTTC-CAAGACCTC    | CACCACACCAGGC-GAAGAT      |
| Caveolin 1 (CAV1)                                               | GCGACCCTAAA-CACCTCAAC     | ATGCCGTCAAACT-GTGTGTC     |
| Cold inducible RNA binding protein (CIRBP)                      | AGGGCTGAGTTTTGA-CACCAA    | ACAAACCCAAATC-CCCAGAT     |
| Ceruloplasmin (CP)                                              | GGGCCATCTACCCT-GATAACA    | TTAAAGGTCCGAT-GAGTCCTGA   |
| Epidermal growth factor receptor (EGFR)                         | AGGCACGAGTAA-CAAGCTCAC    | ATGAGGACATAAC-CAGCCACC    |
| Fatty acid desaturase 1 (FADS1)                                 | CTACCCCGCGC-TACTTCAC      | CGGTGATCACTAG-CCACC       |
| Ferritin mitochondrial (FTMT)                                   | TGGAGTGTGCTC-TACTCTTGG    | ACGTGGT-CACCTAGTTCTTTGA   |
| GA binding protein transcription factor subunit beta 1 (GABPB1) | TCCACTTCATCTAG-CAGCACA    | GTAATGGTGTTCG-GTCCACTT    |
| Glutamate-cysteine ligase catalytic subunit (GCLC)              | GGAGGAAACCAAGC-GCCAT      | CTTGACGGCGTGG-TAGATGT     |
| Glutamate-cysteine ligase modifier subunit (GCLM)               | TGTCTTGGAATG-CACTGTATCTC  | CCCAGTAAGGCTG-TAAATGCTC   |
| Growth differentiation factor 15 (GDF15)                        | GACCCTCAGAGTTG-CACTCC     | GCCTGGTTAGCAG-GTCCTC      |
| Glutamic-oxaloacetic transaminase 1 (GOT1)                      | ATGGCACCTCCGT-CAGTCT      | AGTCATCCGTGCGA-TATGCTC    |
| Glutamic--pyruvic transaminase 2 (GPT2)                         | GTGATGGCACTATG-CACCTAC    | TTCACGGATG-CAGTTGACACC    |
| Glutathione peroxidase 4 (GPX4)                                 | GAGGCAAGACCGAAG-TAAACTAC  | CCGAACCTGGTTA-CACGGGAA    |
| Glutathione synthetase (GSS)                                    | GGGAGCCTCTTGACAG-GATAAA   | GAATGGGG-CATAGCTCACCAC    |
| High mobility group box 1 (HMGB1)                               | GCCTTCTTCCTCTTCT-GCTCTGAG | CTTCGCAACATCAC-CAATGGACAG |
| Isocitrate dehydrogenase (NADP(+)) 1 (IDH1)                     | CACCAAATGGCAC-CATACGAA    | CCCCATAAGCAT-GACGACCTAT   |
| Lysophosphatidylcholine acyltransferase 3 (LPCAT3)              | GGAGCTGAGCCTTAA-CAAGTT    | CAAAGCAAAGGGG-TAACCAG     |
| Matrix metalloproteinase 13 (MMP13)                             | ACTGAGAGGCTC-CGAGAAATG    | GAACCCCG-CATCTTGGCTT      |
| N-myc downstream regulated 1 (NDRG1)                            | CTCCTGCAAGAGTTT-GATGTCC   | TCATGCCGATGT-CATGGTAGG    |

(Continued)

**Table 1.** (Continued)

| Primers (human)                                                                        | forward                    | reverse                  |
|----------------------------------------------------------------------------------------|----------------------------|--------------------------|
| Parkinsonism associated deglycase (PARK7)                                              | GTAGCCGTGATGTG-GTCATTT     | CTGTGCGC-CCAGATTACCT     |
| Poly(ADP-ribose) polymerase 1 (PARP1)                                                  | TCTGAGCTTCGGTGG-GATGA      | TTGGCATACTCT-GCTGCAAAG   |
| Peroxisomal biogenesis factor 6 (PEX6)                                                 | CCCTTTCCGACCGAG-ACAC       | CGCGGCTAACCAG-TAGCTG     |
| Pirin (PIR)                                                                            | GAGCAGTCGGAAGG-GGTTG       | TTAACTCGGGTCTG-CCAATGC   |
| Perilipin 2 (PLIN2)                                                                    | ATGGCATCCGTTG-CAGTTGAT     | GGACATGAGGTCAT-ACGTGGAG  |
| Ribonucleotide reductase regulatory subunit M2 (RRM2)                                  | CACGGAGC-CGAAACTAAAGC      | TCTGCCTTCTTATA-CATCTGCCA |
| Stearoyl-CoA desaturase (SCD)                                                          | TCTAGCTCCTATAC-CACCACCA    | TCGTCTCCAAC-TATCTCCTCC   |
| Solute carrier family 1 member 5 (SLC1A5)                                              | GAGCTGCTTATC-CGCTTCTTC     | GGGGCGTACCA-CATGATCC     |
| Synuclein alpha (SNCA)                                                                 | AAGAGGGTGTTC-TATGTAGGC     | GCTCCTCCAA-CATTGTCACTT   |
| Stathmin 1 (STMN1)                                                                     | TCAGCCCTCGGT-CAAAAGAAT     | TTCTCGTGCTCTC-GTTTCTCA   |
| Transferrin (TF)                                                                       | GTGTGCAGTGTCG-GAGCAT       | CATCGGATGGAAT-GACGCTTT   |
| Transferrin receptor (TFRC)                                                            | ACCATTGTGTCATATAC-CCGGTTCA | CAATAGCCCAAG-TAGCCAATCAT |
| Thymosin beta 4 X-linked (TMSB4X)                                                      | CTGACAAACCCGATAT-GGCTGAG   | GATTGCGCT-GCTTGCTTCTCC   |
| Valosin containing protein (VCP)                                                       | CAAAACAGAAGAAC-CGTCCCAA    | TCACCTCGGAA-CAACTGCAAT   |
| Voltage dependent anion channel 2 (VDAC2)                                              | GGCGTG-GAATTTTCAACGTCC     | AGACCATACTCA-CACCACTTGTA |
| Voltage dependent anion channel 3 (VDAC3)                                              | TTGTACCGAACACAG-GAAAGAAG   | CCCAGCCATAGATG-GTTGGTC   |
| Yes1 associated transcriptional regulator (YAP1)                                       | TAGCCCTGCGTAGC-CAGTTA      | TCATGCTTAGTC-CACTGTCTGT  |
| Tyrosine 3-monooxygenase/tryptophan 5-monooxygenase activation protein epsilon (YWHAE) | TGCGGAGAACAG-CCTAGTG       | CCTAAGC-GAATAGGATGCGTT   |

<https://doi.org/10.1371/journal.pone.0339578.t001>

After blocking with 5% blotting grade non-fat powdered milk solutions for 1 hour at room temperature, the membranes were soaked in the primary antibodies overnight at 4°C. The primary antibodies are listed in [Table 2](#). The membranes were soaked in rabbit anti-goat IgG (Sangon Biotech) for 1 hour at room temperature. The prestained marker of western blot was purchased from HaiGene (Harbin, Heilongjiang, China). Finally, the protein bands were visually detected with a NcmECL ultra efficient chemiluminescence kit (New Cell & Molecular Biotech, Suzhou, Jiangsu, China) using the Alpha Innotech FluorChem FC2 imaging system (Bio-Techne, Minneapolis, MN, USA).

## 2.13 PRM proteomic quantitative analysis of target proteins

The HeLa cells were treated with two concentrations of 6-methoxyflavone (0.16% DMSO and 65 μM) for 48 hours. Parallel reaction monitoring (PRM) protein quantitative detection include three control group and three treatment group cell

**Table 2. Antibody and dilution for western blot.**

| Primary antibody | Primary antibody source | Primary antibody dilution | Secondary antibody                  | Secondary antibody dilution | Company                              |
|------------------|-------------------------|---------------------------|-------------------------------------|-----------------------------|--------------------------------------|
| ASNS             | Rabbit                  | 1/1000                    | HRP-conjugated Goat anti rabbit IgG | 1/5000                      | Sangon Biotech, Shanghai, China      |
| GAPDH            | Rabbit                  | 1/5000                    | HRP-conjugated Goat anti rabbit IgG | 1/5000                      | Sangon Biotech, Shanghai, China      |
| GPT2             | Rabbit                  | 1/400                     | HRP-conjugated Goat anti rabbit IgG | 1/5000                      | Sangon Biotech, Shanghai, China      |
| PEX6             | Rabbit                  | 1/1000                    | HRP-conjugated Goat anti rabbit IgG | 1/5000                      | Immunoway Biotech, SuZhou, China     |
| RRM2             | Rabbit                  | 1/1000                    | HRP-conjugated Goat anti rabbit IgG | 1/5000                      | Immunoway Biotech, SuZhou, China     |
| SCD              | Rabbit                  | 1/600                     | HRP-conjugated Goat anti rabbit IgG | 1/5000                      | Sangon Biotech, Shanghai, China      |
| SLC1A5           | Rabbit                  | 1/2000                    | HRP-conjugated Goat anti rabbit IgG | 1/5000                      | Proteintech Biotech, Shanghai, China |
| TMSB4X           | Rabbit                  | 1/1000                    | HRP-conjugated Goat anti rabbit IgG | 1/5000                      | Immunoway Biotech, SuZhou, China     |
| VCP              | Rabbit                  | 1/300                     | HRP-conjugated Goat anti rabbit IgG | 1/5000                      | Sangon Biotech, Shanghai, China      |
| VDAC3            | Rabbit                  | 1/800                     | HRP-conjugated Goat anti rabbit IgG | 1/5000                      | Sangon Biotech, Shanghai, China      |

<https://doi.org/10.1371/journal.pone.0339578.t002>

samples. PRM was used to quantitatively detect the expression levels of differentially expressed ferroptosis-related proteins. Mass spectrometry (MS) was performed at Applied Protein Technology Biotech (Shanghai, China). The PRM proteomic analysis was performed on a Q Exactive Orbitrap mass spectrometer (Thermo Fisher Scientific) that was coupled to Easy nLC system (Thermo Fisher Scientific) for 60 minutes. Skyline 3.5.0 software [22] was used to quantify peptide segment expression levels. Finally, the expression data for these ferroptosis-related proteins was extracted from TMT and PRM proteomics.

## 2.14 Functional domain analyses of ferroptosis-related proteins

After treatment with 65  $\mu$ M 6-methoxyflavone for 48 hours, InterProScan software [23] was used to perform functional characterization of the sequences detected by MS to obtain domain annotation information of the target sequences in the Pfam database [24].

## 2.15 Structural changes in ferroptosis-related genes

After treatment with 65  $\mu$ M 6-methoxyflavone for 48 hours, the HeLa cells were subjected to total RNA extraction, quality control, RNA library construction, alternative splicing, and new transcript analyses at Sangon Biological (Shanghai, China). The Illumina HiSeq platform (Illumina, San Diego, California, USA), ASprofier [25], StringTie [26], and GffCompare [27] softwares were used for these analyses.

## 2.16 Molecular docking and interaction analyses

The 6-methoxyflavone structure was downloaded from PubChem [28]. ASNS and SLC1A5 structures were downloaded from AlphaFold [29,30]. AutoDock Vina [31] was used to perform molecular docking of 6-methoxyflavone with

the two target proteins. Protein–Ligand Interaction Profiler [32] was used to identify non-covalent interactions between 6-methoxyflavone and the two target proteins. The inhibition constant and dissociation constant were calculated based on the free energy required for molecular docking.

## 2.17 Statistical analysis

All experiments were conducted with three biological replicates. Six replicates were set for each biological repetition in the CCK8 experiment. Three replicates were set for each biological repetition in the qPCR experiments. GraphPad Prism (v.8.4.3) was used for statistical analyses. The testing methods included unpaired t-tests, paired t-tests, and one-way analysis of variance (ANOVA). The GO function and KEGG pathway enrichment analyses were conducted utilizing Fisher's Exact Test. Statistical significance was set at  $p < 0.05$ . What's more, in this study, the negative control treatment selected was 0.16% DMSO [33].

## 3 Results

### 3.1 6-Methoxyflavone inhibits the proliferation of HeLa cells

Following the treatment of HeLa cells with five concentrations of 6-methoxyflavone (0.16% DMSO, 20  $\mu$ M, 40  $\mu$ M, 80  $\mu$ M, and 100  $\mu$ M) for durations of 24 and 48 hours, we evaluated cell viability using the CCK8 assay. The findings indicated that 6-methoxyflavone inhibited the viability and proliferation of HeLa cells. Fig 1A demonstrates the inhibitory effect of 6-methoxyflavone on HeLa cells after 24 and 48 hours of treatment. The IC<sub>50</sub> values were 104.81  $\mu$ M and 67.53  $\mu$ M, respectively. Consequently, we selected a duration of 48 hours for the subsequent assays and determined an approximate concentration of 67.53  $\mu$ M, which is roughly equivalent to 65  $\mu$ M, for the following experiments.

### 3.2 6-Methoxyflavone induces ferroptosis in HeLa cells

After treatment with 65  $\mu$ M of 6-methoxyflavone, differential expression profiles of 260 metabolites were obtained by non-targeted metabolomic analysis. KEGG pathway enrichment analysis of the 260 metabolites indicated that 6-methoxyflavone was significantly correlated with ferroptosis, glutathione metabolism, and alanine, aspartate, and glutamate metabolic pathways. Differential expression profiles of 82 metabolites were obtained by targeted metabolomic analysis. KEGG analysis of the 82 metabolites indicated that 6-methoxyflavone was significantly correlated with ferroptosis, unsaturated fatty acid biosynthesis, D-glutamine and D-glutamate metabolism, and alanine, aspartate, and glutamate metabolic pathways. Fatty acid, alanine, aspartate, glutamate, glutathione, D-Glutamine, and D-glutamate metabolism are closely related to ferroptosis, and are all ferroptosis-related metabolites. 6-Methoxyflavone was markedly correlated with the ferroptosis pathway (Table 3).

Transmission electron microscopy (TEM) is a crucial tool for detecting ferroptosis. TEM can directly observe the characteristic morphological features of ferroptosis and the differences in subcellular ultrastructure, making it an important criterion for identifying ferroptosis. TEM can be used to distinguish between apoptosis, necrosis, and ferroptosis [34]. The typical TEM manifestations of apoptosis include the formation of chromatin margination and apoptotic bodies, while mitochondria appear normal or swollen [34,35]. In contrast, cell necrosis is characterized by rupture of the cytoplasmic and nuclear membranes, accompanied by swollen mitochondria [34,36]. Typical TEM features of ferroptosis include mitochondrial shrinkage, reduced mitochondrial volume, and decreased or absent mitochondrial cristae [34,37]. HeLa cells treated with 0.16% DMSO had normal cytoplasmic and nuclear membranes, mitochondria, and mitochondrial cristae (Fig 1B–1D). However, after treatment with 6-methoxyflavone, ferroptosis morphological changes at various stages were observed in HeLa cells, such as cytoplasmic membrane rupture, mitochondrial wrinkling, increased mitochondrial membrane density, reduced mitochondrial volume, and decreased or disappeared mitochondrial cristae (Fig 1E–1J). 6-Methoxyflavone primarily exerts its effects on the mitochondria of HeLa cells. These TEM images indicated that 6-methoxyflavone markedly induced ferroptosis in HeLa cells (Fig 1B–1J).

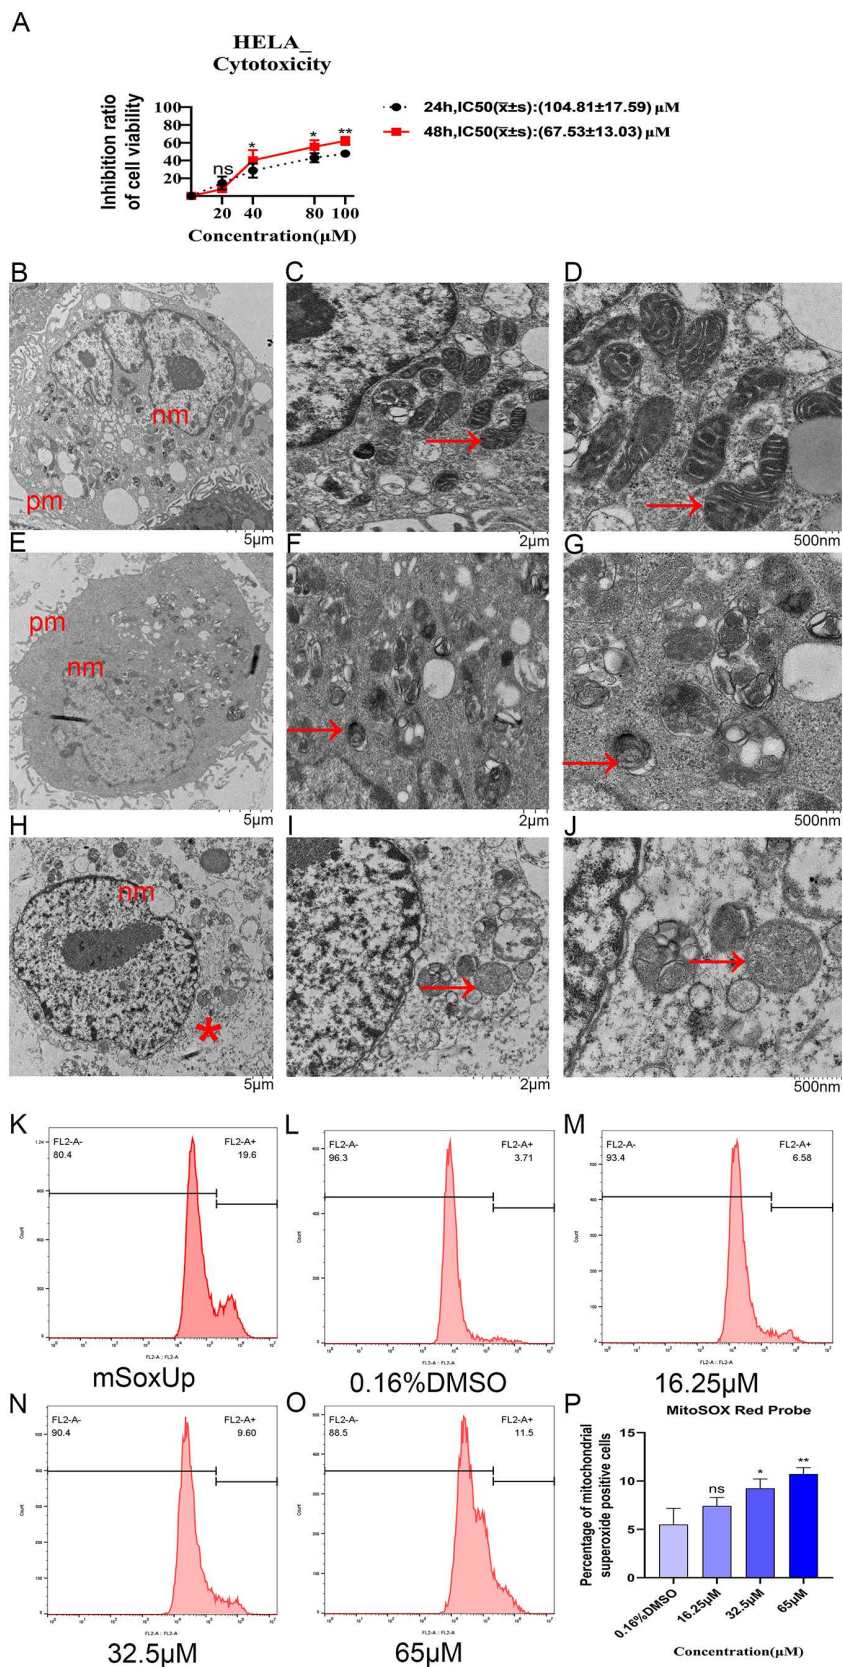

**Fig 1. 6Methoxyflavone inhibits cell proliferation, induces ferroptosis, and upregulates the expression level of mitochondrial superoxide in HeLa cells.** A. 6-Methoxyflavone inhibits cell viability and proliferation in HeLa cells. The cells were treated with five concentrations of 6-methoxyflavone (0.16% DMSO, 20  $\mu$ M, 40  $\mu$ M, 80  $\mu$ M, and 100  $\mu$ M) for 24 and 48 hours. The cell counting kit 8 (CCK8) was used to assess the cell viability and proliferation of 6-methoxyflavone on HeLa cells. The half-maximal inhibitory concentration (IC50) values were determined utilizing GraphPad Prism. All experiments were carried out with three biological replicates, and each biological replicate was accompanied by six technical replicates. \* $p < 0.05$ . \*\* $p < 0.01$ . ns: not significant. DMSO: dimethyl sulfoxide. B–J. 6-Methoxyflavone induces ferroptosis in HeLa cells. Transmission electron microscopy images of HeLa cells after treatment with 6-methoxyflavone. All assessments were repeated at least thrice. B–D: Normal HeLa cell control group treated with 0.16% DMSO. E–J: HeLa cells treated with 65  $\mu$ M 6-methoxyflavone for 48 hours. E–G: Early stage of ferroptosis: Intact cytoplasmic and nuclear membrane, increased mitochondrial membrane density, reduced mitochondrial volume, and decreased or disappeared mitochondrial cristae. H–J: Late stage of ferroptosis: Cytoplasmic membrane rupture, intact nuclear membrane, mitochondrial wrinkling, increased mitochondrial membrane density, decreased or disappeared mitochondrial cristae. pm: cytoplasmic membrane; nm: nuclear membrane; \*: cytoplasmic membrane rupture. Arrows indicate mitochondria. K–P: 6-Methoxyflavone upregulates the expression level of mitochondrial superoxide in HeLa cells. The cells were treated with four concentrations of 6-methoxyflavone (0.16% DMSO, 16.25  $\mu$ M, 32.5  $\mu$ M, and 65  $\mu$ M) for 48 hours. All experiments were performed using three biological replicates. Statistical analysis was performed using a one-way analysis of variance (ANOVA). K–O. 6-Methoxyflavone upregulates the fluorescence intensity of mitochondrial superoxide in HeLa cells. The mSoxUp was a positive control included with the kit. The flow cytometer and mitochondrial superoxide assay kit were used to detect the fluorescence intensity of MitoSOX Red probe. P. The histogram shows the percentage of mitochondrial superoxide positive cells in Fig 1K–1O. \* $p < 0.05$ . \*\* $p < 0.01$ . ns: not significant.  $\bar{x} \pm s$ : mean  $\pm$  standard deviation.

<https://doi.org/10.1371/journal.pone.0339578.g001>

**Table 3. Functional or pathway enrichment analyses of multi-omics.**

| Analysis                                           | Term ID    | Term Name                                    | Test/Ref | p       |
|----------------------------------------------------|------------|----------------------------------------------|----------|---------|
| TMT proteomics<br>Functional enrichment            | GO:0006801 | Superoxide metabolic process                 | 5/22     | 0.03    |
|                                                    | GO:0090322 | Regulation of superoxide metabolic process   | 4/14     | 0.02    |
|                                                    | GO:0000303 | Response to superoxide                       | 4/14     | 0.02    |
|                                                    | GO:0071451 | Cellular response to superoxide              | 4/13     | 0.02    |
|                                                    | GO:0019430 | Removal of superoxide radicals               | 4/11     | 0.009   |
|                                                    | GO:2000121 | Regulation of removal of superoxide radicals | 2/4      | 0.03    |
| Non-targeted<br>metabolomics<br>Pathway enrichment | hsa04216   | <b>Ferroptosis</b>                           | 5/29     | 0.004   |
|                                                    | hsa00250   | Alanine, aspartate and glutamate metabolism  | 6/28     | 0.0005  |
|                                                    | hsa00480   | Glutathione metabolism                       | 5/38     | 0.01    |
| Targeted<br>metabolomics<br>Pathway enrichment     | hsa04216   | <b>Ferroptosis</b>                           | 5/29     | 0.0001  |
|                                                    | hsa01040   | Biosynthesis of unsaturated fatty acids      | 9/74     | 3.7E-06 |
|                                                    | hsa00471   | D-Glutamine and D-glutamate metabolism       | 2/13     | 0.02    |
|                                                    | hsa00250   | Alanine, aspartate and glutamate metabolism  | 4/28     | 0.001   |

Abbreviations: Test/Ref, Number of differentially expressed proteins or metabolites/total number of proteins or metabolites in the term.

<https://doi.org/10.1371/journal.pone.0339578.t003>

After treatment with 65  $\mu$ M of 6-methoxyflavone, differential expression profiles of 526 proteins were obtained by TMT proteomic analysis. GO analysis of the 526 proteins indicated that 6-methoxyflavone was significantly correlated with superoxide (Table 3).

Mitochondrion superoxide is important detection indicators for ferroptosis. The results of the mitochondrion superoxide assay showed that both 32.5  $\mu$ M and 65  $\mu$ M of 6-methoxyflavone significantly upregulated the expression level of superoxide in the mitochondria of HeLa cells (Fig 1K–1O). 6-Methoxyflavone exhibited a specific impact on mitochondria (Fig 1K–1P).

We measured the percentage of the apoptotic HeLa cells using the Annexin V-APC/PI apoptosis detection kit. The findings from the flow cytometry analysis indicated significant increases in the apoptosis rate of HeLa cells following treatment with 6-methoxyflavone at concentrations of 32.5  $\mu$ M and 65  $\mu$ M, in comparison to the 0.16% DMSO group. However, no significant alterations were observed with the 6-methoxyflavone at 16.25  $\mu$ M (Fig 2A–2E). GSH and GSSG are important detection indicators for ferroptosis. Glutathione consumption is the core indicator of ferroptosis. Glutathione depletion

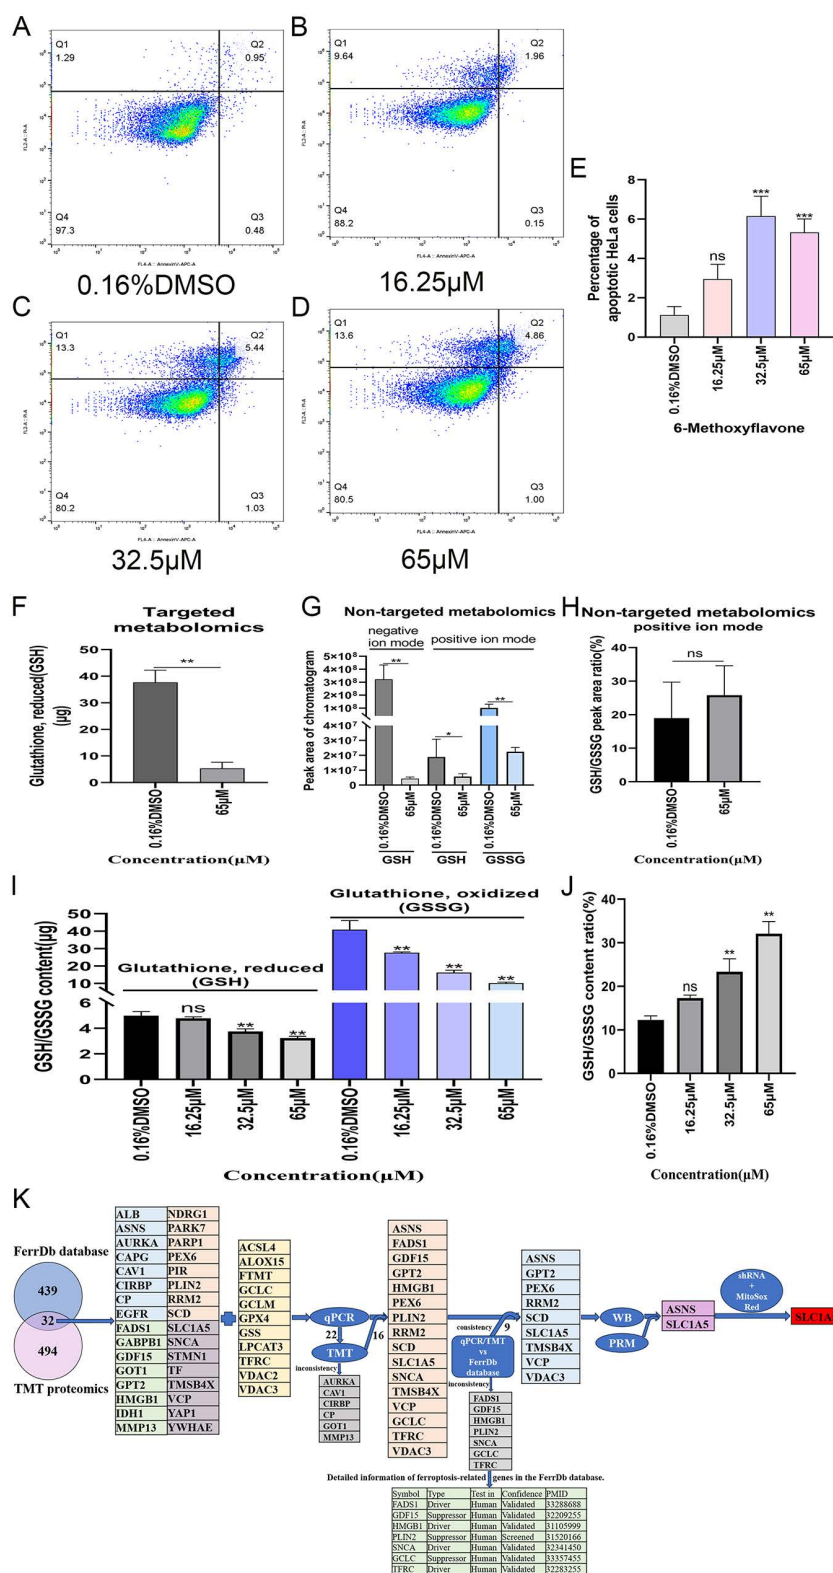

**Fig 2. The cell apoptosis assay, the expression level of glutathione, and the flowchart for exploring the molecular mechanism.** A-E. The cell apoptosis assay. A-D. After annexin V-allophycocyanin/ propidium iodide staining, the percentage of HeLa cells in different stages was measured by

flow cytometer. **E.** The histogram shows the percentage of the apoptotic HeLa cells in A-D. Statistical analysis was performed using a one-way analysis of variance (ANOVA). ns: no significance; \*:  $p < 0.05$ ; \*\*:  $p < 0.01$ ; \*\*\*:  $p < 0.001$ . Three biological replicates were performed for all experiments. F-J. The expression levels of reduced glutathione (GSH) and oxidized glutathione (GSSG). All assays were repeated at least thrice. \* $p < 0.05$ . \*\* $p < 0.01$ . ns: not significant. F-H. The HeLa cells were treated with two concentrations of 6-methoxyflavone (0.16% DMSO and 65  $\mu$ M) for 48 hours. Statistical analysis was performed using unpaired t-tests. **F.** The expression levels of GSH in targeted metabolomics. **G.** The expression levels of GSH and GSSG in non-targeted metabolomics. **H.** The ratio of GSH/GSSG in positive ion mode of non-targeted metabolomics analysis. I-J. The HeLa cells were treated with four concentrations of 6-methoxyflavone (0.16% DMSO, 16.25  $\mu$ M, 32.5  $\mu$ M, and 65  $\mu$ M) for 48 hours. The GSH and GSSG content assays and a microplate reader were used to detect the content of GSH and GSSG. Statistical analysis was performed using a one-way analysis of variance (ANOVA). **J.** The ratios of GSH/GSSG in the GSH and GSSG content assays. **K.** The flowchart for exploring the molecular mechanism of 6-methoxyflavone induced ferroptosis in HeLa cells.

<https://doi.org/10.1371/journal.pone.0339578.g002>

directly leads to the accumulation of peroxides, driving ferroptosis [38]. The targeted metabolomics analysis indicated a significant downregulation in the expression level of GSH after treatment with 65  $\mu$ M of 6-methoxyflavone (Fig 2F). Additionally, the non-targeted metabolomics analysis revealed that the expression levels of GSH and GSSG were significantly downregulated after treatment with 65  $\mu$ M of 6-methoxyflavone (Fig 2G). Furthermore, the non-targeted metabolomics analysis in positive ion mode showed that the GSH/GSSG ratio did not significantly change after treatment with 6-methoxyflavone (Fig 2H). The assay for measuring the content of reduced and oxidized glutathione indicated that the levels of GSH were significantly downregulated by 6-methoxyflavone at concentrations of 32.5  $\mu$ M and 65  $\mu$ M. Additionally, the levels of GSSG were significantly downregulated by 6-methoxyflavone at concentrations of 16.25  $\mu$ M, 32.5  $\mu$ M, and 65  $\mu$ M (Fig 2I). Furthermore, the GSH/GSSG ratio was significantly upregulated by 6-methoxyflavone at concentrations of 32.5  $\mu$ M and 65  $\mu$ M (Fig 2J).

### 3.3 6-Methoxyflavone alters ferroptosis-related metabolites expression

Arachidonic acid, adrenic acid, glutathione (reduced), glutathione (oxidized), glutamate, cysteine, and glutamine are closely related to ferroptosis, and are all ferroptosis-related metabolites. 6-Methoxyflavone significantly upregulated arachidonic acid and adrenic acid expression, whereas it significantly downregulated glutathione (reduced), glutathione (oxidized), glutamate, cysteine, and glutamine expression (Table 4, S1–S4 Files). 6-Methoxyflavone markedly altered ferroptosis-related metabolites expression.

**Table 4. Differential expression metabolites related to ferroptosis.**

| Mode                                          | KEGG_ID | Name                  | Fold change | p        | VIP  |
|-----------------------------------------------|---------|-----------------------|-------------|----------|------|
| Targeted metabolomics                         | C00051  | Glutathione, reduced  | 0.14        | 2.66E-08 | —    |
| Non-targeted metabolomics (negative ion mode) | C00051  | Glutathione, reduced  | 0.01        | 3.31E-05 | 4.64 |
| Non-targeted metabolomics (positive ion mode) | C00051  | Glutathione, reduced  | 0.30        | 0.02     | 0.54 |
| Non-targeted metabolomics (positive ion mode) | C00127  | Glutathione, oxidized | 0.22        | 4.27E-05 | 1.54 |
| Non-targeted metabolomics (positive ion mode) | C00025  | Glutamate             | 0.68        | 3.34E-06 | 4.02 |
| Non-targeted metabolomics (negative ion mode) | C00025  | Glutamate             | 0.74        | 2.42E-05 | 4.43 |
| Targeted metabolomics                         | C00025  | Glutamate             | 0.33        | 1.63E-09 | —    |
| Non-targeted metabolomics (negative ion mode) | C00219  | Arachidonic acid      | 2.98        | 0.0006   | 4.52 |
| Targeted metabolomics                         | C00219  | Arachidonic acid      | 2.27        | 0.001    | —    |
| Targeted metabolomics                         | C16527  | Adrenic acid          | 2.71        | 0.0002   | —    |
| Targeted metabolomics                         | C00491  | Cystine               | 0.54        | 0.004    | —    |
| Non-targeted metabolomics (positive ion mode) | C00064  | D-glutamine           | 0.12        | 2.53E-09 | 6.63 |
| Non-targeted metabolomics (negative ion mode) | C00303  | DL-glutamine          | 0.08        | 1.34E-08 | 6.97 |
| Targeted metabolomics                         | C00064  | Glutamine             | 0.08        | 8.16E-09 | —    |

<https://doi.org/10.1371/journal.pone.0339578.t004>

### 3.4 6-Methoxyflavone alters expression of ferroptosis-related genes and proteins

Mitochondrion superoxide assay, transmission electron microscopy imaging, GSH and GSSG content assay, non-targeted and targeted metabolomic analyses all indicated 6-methoxyflavone induced ferroptosis in HeLa cells. Therefore, we conducted TMT proteomics to explore the molecular mechanism of 6-methoxyflavone induced ferroptosis in HeLa cells. After treatment with 65  $\mu$ M of 6-methoxyflavone, differential expression profiles of 526 proteins were obtained by TMT proteomic analysis.

A list of 471 human ferroptosis-related genes was downloaded from FerrDB. We overlapped the 526 significantly differentially expressed proteins with the 471 encoded proteins of human ferroptosis-related genes, resulting in 32 significantly differentially expressed human ferroptosis-related proteins (Fig 2K). We extracted the expression profile data of these 32 proteins from the TMT proteome (Table 5, Fig 3A–3D). Moreover, another list of 11 ferroptosis-related genes was downloaded from the KEGG official website (Fig 2K). After treatment with 32.5  $\mu$ M of 6-methoxyflavone, we performed qPCR analyses on these 43 genes. The qPCR results indicated that 22 out of 43 genes exhibited significant differential expression at the mRNA level (Fig 2K, Fig 3E–3I). The expression trends of 16 out of these 22 genes were consistent with their expression in the TMT proteome (Table 5). The expression trends of 9 out of the 16 genes, as measured by TMT or qPCR, aligned with the data in the FerrDb database (Table 5). After treating with 32.5  $\mu$ M and 65  $\mu$ M of 6-methoxyflavone, we conducted western blot analyses on the proteins encoded by these nine genes. These nine genes were ASNS, GPT2, PEX6, RRM2, SCD, SLC1A5, TMSB4X, VCP, and VDAC3 (Fig 2K). After treatment with 32.5  $\mu$ M and 65  $\mu$ M of 6-methoxyflavone, the western blot results revealed significant differential expression in only two proteins at both concentrations. These two significantly differentially expressed proteins were ASNS and SLC1A5 (Fig 2K, Fig 4). We extracted

**Table 5. Expression trends at mRNA and protein levels.**

| Targets | TMT Fold Change | TMT p value | qPCR Fold Change | qPCR p value | Expression trends at mRNA and protein levels | TMT/qPCR Expression trends vs FerrDb database |
|---------|-----------------|-------------|------------------|--------------|----------------------------------------------|-----------------------------------------------|
| ASNS    | 1.53            | < 0.01      | 8.03             | < 0.01       | consistency                                  | consistency                                   |
| FADS1   | 0.72            | < 0.01      | 0.59             | < 0.01       | consistency                                  | inconsistency                                 |
| GDF15   | 1.27            | < 0.01      | 12.88            | < 0.01       | consistency                                  | inconsistency                                 |
| GPT2    | 1.3             | 0.01        | 2.59             | 0.02         | consistency                                  | consistency                                   |
| HMGB1   | 0.77            | 0.03        | 0.72             | 0.04         | consistency                                  | inconsistency                                 |
| PEX6    | 1.21            | 0.01        | 2.75             | 0.02         | consistency                                  | consistency                                   |
| PLIN2   | 1.62            | < 0.01      | 1.80             | < 0.01       | consistency                                  | inconsistency                                 |
| RRM2    | 0.79            | 0.03        | 0.81             | < 0.01       | consistency                                  | consistency                                   |
| SCD     | 0.8             | < 0.01      | 0.72             | < 0.01       | consistency                                  | consistency                                   |
| SLC1A5  | 1.38            | < 0.01      | 1.66             | 0.02         | consistency                                  | consistency                                   |
| SNCA    | 0.79            | < 0.01      | 0.54             | < 0.01       | consistency                                  | inconsistency                                 |
| TMSB4X  | 0.59            | < 0.01      | 0.69             | 0.02         | consistency                                  | consistency                                   |
| VCP     | 0.75            | 0.04        | 0.61             | 0.03         | consistency                                  | consistency                                   |
| GCLC    | —               | —           | 2.93             | < 0.01       | —                                            | inconsistency                                 |
| TFRC    | —               | —           | 0.77             | 0.03         | —                                            | inconsistency                                 |
| VDAC3   | —               | —           | 0.74             | < 0.01       | —                                            | consistency                                   |
| AURKA   | 1.22            | 0.02        | 0.70             | 0.03         | inconsistency                                | —                                             |
| CAV1    | 1.28            | < 0.01      | 0.63             | < 0.01       | inconsistency                                | —                                             |
| CIRBP   | 0.82            | 0.02        | 1.21             | 0.04         | inconsistency                                | —                                             |
| CP      | 1.38            | < 0.01      | 0.24             | 0.02         | inconsistency                                | —                                             |
| GOT1    | 0.80            | 0.03        | 1.26             | < 0.01       | inconsistency                                | —                                             |
| MMP13   | 1.39            | 0.02        | 0.43             | 0.01         | inconsistency                                | —                                             |

<https://doi.org/10.1371/journal.pone.0339578.t005>

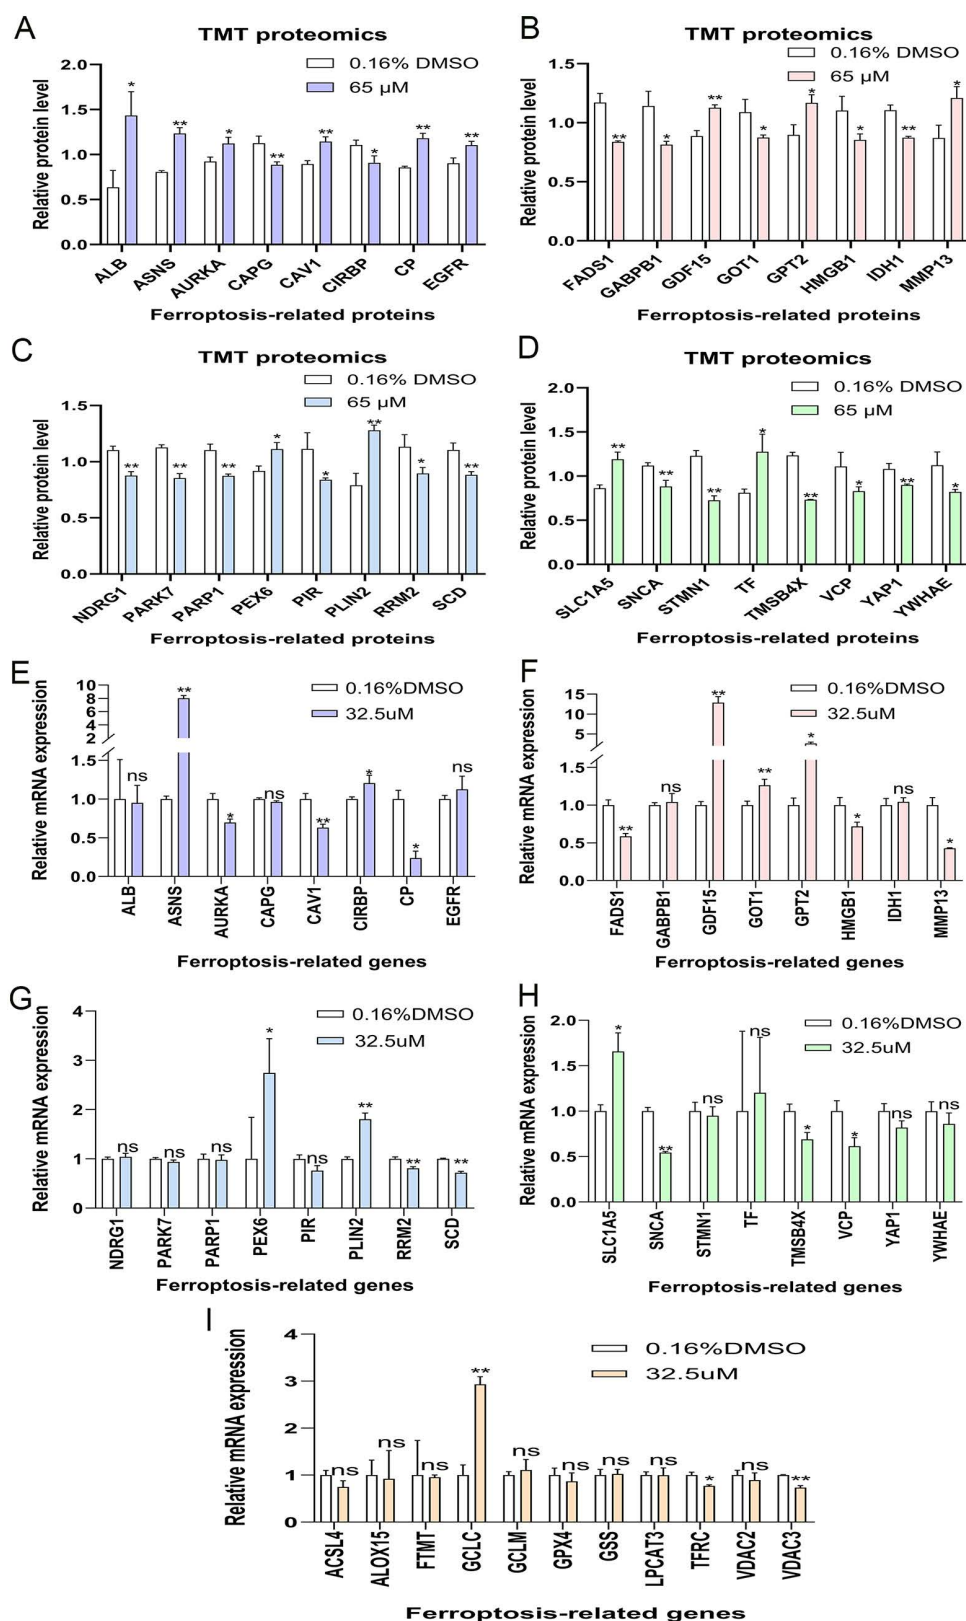

**Fig 3. The expression levels of human ferroptosis-related proteins and genes.** A-D. The expression levels of 32 significantly differentially expressed human ferroptosis-related proteins in the tandem mass tag (TMT) proteome. The HeLa cells were treated with two concentrations of

6-methoxyflavone (0.16% DMSO and 65  $\mu$ M) for 48 hours. Statistical analysis was performed using t-tests. E-I. The expression levels of 43 human ferroptosis-related genes in the quantitative polymerase chain reaction (qPCR) assays. The HeLa cells were treated with two concentrations of 6-methoxyflavone (0.16% DMSO and 32.5  $\mu$ M) for 48 hours. Statistical analysis was performed using paired t-tests. All assays were repeated at least thrice. \* $p < 0.05$ . \*\* $p < 0.01$ . ns: not significant.

<https://doi.org/10.1371/journal.pone.0339578.g003>

mass spectrograms and differentially expressed peptide sequences of ASNS and SLC1A5 from the TMT proteome (Fig 5A–5B). The results of TMT proteome showed that 6-methoxyflavone significantly upregulated ASNS and SLC1A5 expression (Fig 5F).

### 3.5 6-Methoxyflavone upregulates ASNS and SLC1A5 expression

After treatment with 65  $\mu$ M of 6-methoxyflavone, we conducted PRM proteomic analyses (S5 File) on ASNS (Fig 5C–E) and SLC1A5 (Fig 5G–I) using Skyline software. The results of PRM proteome showed that 6-methoxyflavone significantly upregulated ASNS and SLC1A5 expression (Fig 5J).

### 3.6 6-Methoxyflavone alters the functional domains of ASNS and SLC1A5

After treatment with 65  $\mu$ M of 6-methoxyflavone, 6-methoxyflavone significantly upregulated ASNS and SLC1A5 expression. 6-Methoxyflavone altered the functional domains of ASNS and SLC1A5 (Table 6). The peptide segment amino acid sequence of ASNS and SLC1A5 were VDGEILHLYDK and LGPEGELLIR in TMT and PRM proteome, respectively (Fig 5A–5J, Table 6).

### 3.7 6-Methoxyflavone alters the structure of ferroptosis-related genes

After treatment with 65  $\mu$ M of 6-methoxyflavone, the alternative splicing types of AE and TSS in SLC1A5 were altered. ASNS exhibited the most significant changes in alternative splicing types and sites (Table 7, S6 File). After treatment with 65  $\mu$ M of 6-methoxyflavone, ASNS and SLC1A5 each produced a new transcript (Table 8, S7 File).

### 3.8 6-Methoxyflavone has the strongest affinity for SLC1A5

6-Methoxyflavone had the strongest affinity for SLC1A5 (Fig 5L; Table 9). The free energy of ASNS and SLC1A5 were  $-6.9$  and  $-8.4$ , respectively (Fig 5K–5L; Table 9). The primary types of non-covalent interactions between 6-methoxyflavone and the two target proteins were hydrophobic interaction and hydrogen bond (Fig 5M–5N; Table 9). These results indicated that 6-methoxyflavone has affinities for two ferroptosis-related proteins, all of which have non-covalent interaction sites (Fig 5K–5O; Table 9). The core gene responsible for inducing ferroptosis in HeLa cells by 6-methoxyflavone was SLC1A5.

### 3.9 The functional roles of ASNS and SLC1A5 in 6-methoxyflavone-induced ferroptosis

In summary, we found that ASNS and SLC1A5 was the important gene biomarkers of 6-methoxyflavone-induced ferroptosis in HeLa cells. To determine the specific functional roles of ASNS and SLC1A5, we performed loss-of-function genetic manipulation and mitochondrial superoxide assays. Fig 6A shows the pGPU6/GFP/Neo blank vector atlas. The shRNA sequences are listed in Fig 6B. The results of qPCR showed that the shRNA interference plasmids of ASNS and SLC1A5 were successfully constructed (Fig 6C). The intervention efficiency of ASNS and SLC1A5 met the requirements of genetic manipulation. Fig 6D shows untreated HeLa cells stained with MitoSOX Red. Fig 6E displays HeLa cells with GFP fluorescence after transfection with a negative control plasmid. The results of mitochondrial superoxide assays showed that 6-methoxyflavone significantly upregulated superoxide levels

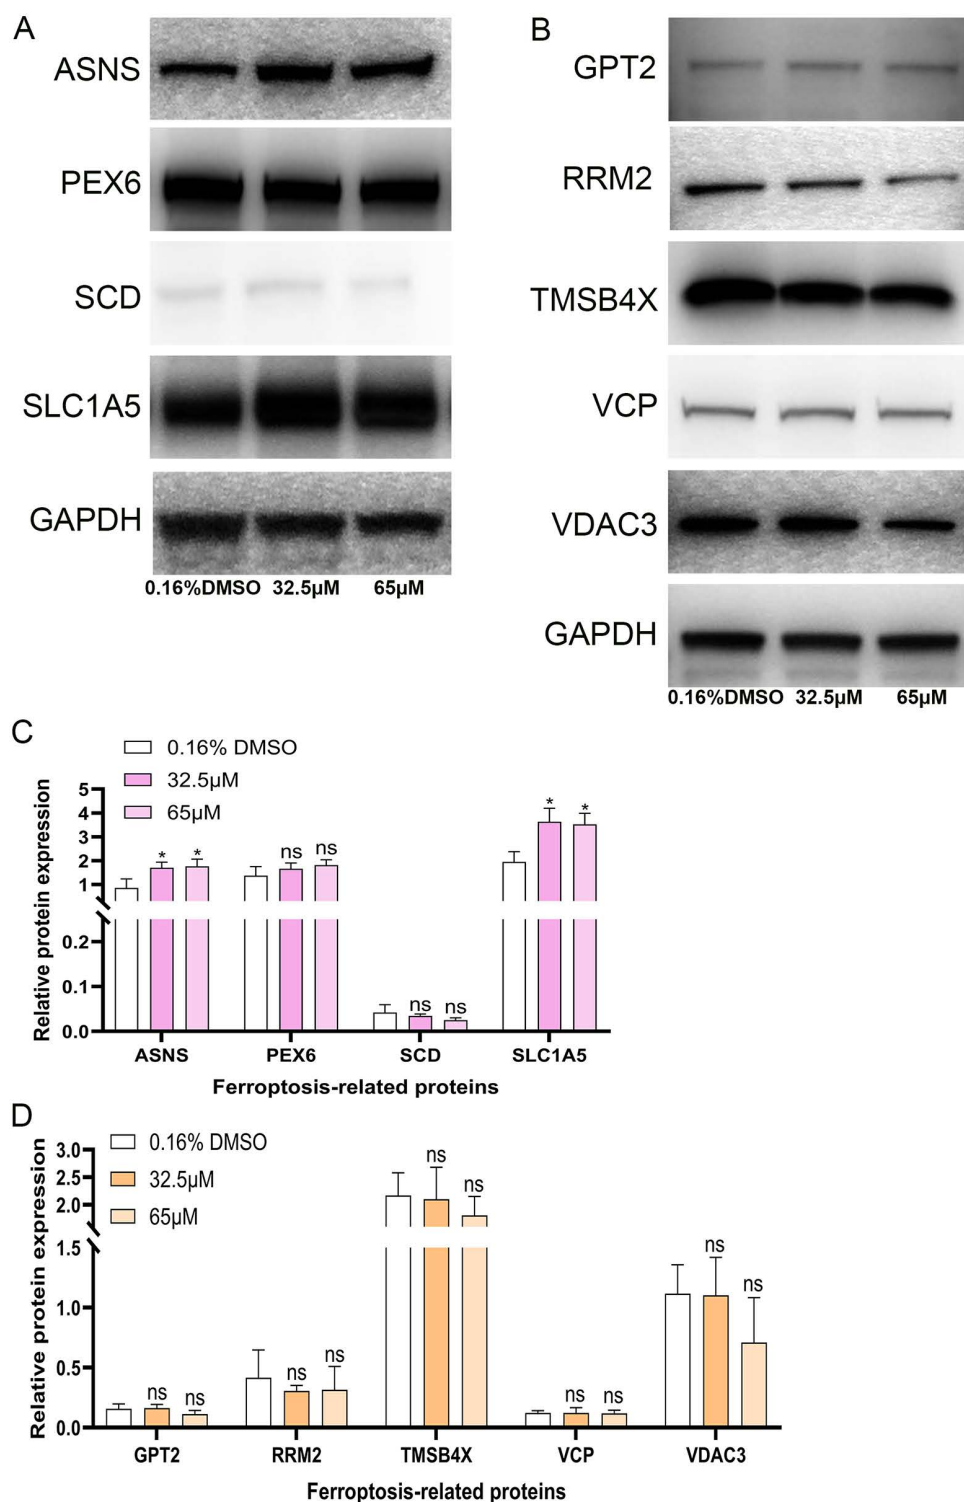

**Fig 4. Expression levels of ferroptosis-related proteins in western blot assays.** A-B. Western blot images of 9 human ferroptosis-related proteins. The HeLa cells were treated with three concentrations of 6-methoxyflavone (0.16% DMSO, 32.5 μM, and 65 μM) for 48 hours. All assays were repeated at least thrice. C-D. The histogram shows the relative protein expression levels in Fig 4A-B. Statistical analysis was performed using a one-way analysis of variance (ANOVA). \* $p < 0.05$ . ns: not significant.

<https://doi.org/10.1371/journal.pone.0339578.g004>

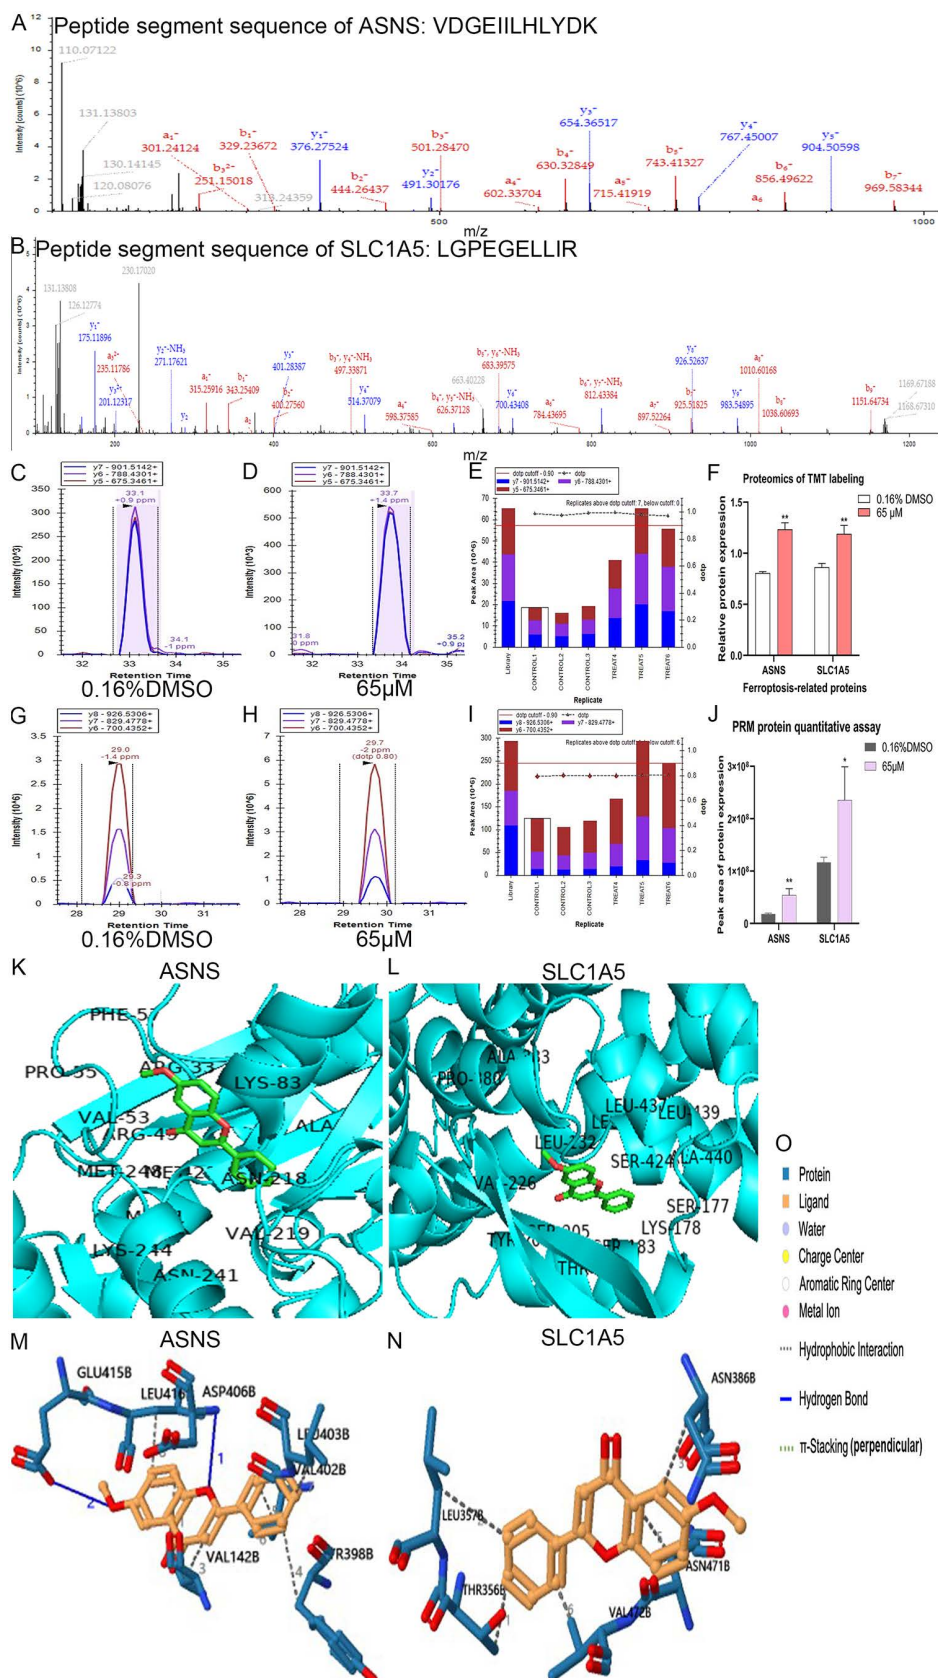

**Fig 5. Expression, affinity, and non-covalent interactions analyses of ferroptosis-related proteins.** A–J. Expression levels of ferroptosis-related proteins in TMT and PRM proteomics. The HeLa cells were treated with two concentrations of 6-methoxyflavone (0.16% DMSO and 65  $\mu$ M) for 48 hours. All assays were repeated at least thrice. Statistical analysis was performed using t-tests. \* $p < 0.05$ . \*\* $p < 0.01$ . ns: not significant. ASNS: Asparagine synthetase (glutamine-hydrolyzing). SLC1A5: Solute carrier family 1 member 5. A–B. The mass spectrogram of peptide segments of ASNS and SLC1A5 in the TMT proteome. The peptide segment amino acid sequence of ASNS and SLC1A5 were VDGEIILHLYDK and LGPEGELLIR. F. The relative protein expression levels of ASNS and SLC1A5 in the TMT proteome. C–E, G–J. Expression levels of ASNS and SLC1A5 in PRM proteomics. C–D, G–H. Peak area chromatograms in Skyline software. E, I. Peak area histograms in Skyline software. J. The relative protein expression levels of ASNS and SLC1A5 in the PRM proteome. K–O. Analyses of affinity and non-covalent interactions between 6-methoxyflavone and the two target proteins. K–L: Molecular docking results. M–N: Non-covalent interactions. O: Annotations for M–N.

<https://doi.org/10.1371/journal.pone.0339578.g005>

**Table 6. Functional domain and peptide segment sequence analyses of ferroptosis-related proteins.**

| Protein | Gene   | Domain  | Name                                  | Start_location | Stop_location | Amino acid sequence of peptide segment |
|---------|--------|---------|---------------------------------------|----------------|---------------|----------------------------------------|
| P08243  | ASNS   | PF13537 | Glutamine amidotransferase domain     | 49             | 164           | VDGEIILHLYDK                           |
| P08243  | ASNS   | PF00733 | Asparagine synthase                   | 235            | 385           | VDGEIILHLYDK                           |
| Q15758  | SLC1A5 | PF00375 | Sodium:dicarboxylate symporter family | 54             | 483           | LGPEGELLIR                             |

<https://doi.org/10.1371/journal.pone.0339578.t006>

**Table 7. Alternative splicing analyses of ferroptosis-related genes.**

| Group          | AE | MSKIP | SKIP | TSS | TTS | XMSKIP | XSKIP |
|----------------|----|-------|------|-----|-----|--------|-------|
| ASNS_control   | 10 | 18    | 14   | 14  | 5   | 6      | 4     |
| ASNS_treat     | 12 | 28    | 18   | 18  | 3   | 10     | 6     |
| SLC1A5_control | 2  | 0     | 0    | 18  | 3   | 0      | 12    |
| SLC1A5_treat   | 0  | 0     | 0    | 17  | 3   | 0      | 12    |

Abbreviations: AE, Alternative exon ends; TSS, Transcription start site; TTS, transcription terminal site; SKIP, Skipped exon; XSKIP, Approximate SKIP; MSKIP, Multi-exon SKIP; XMSKIP, Approximate MSKIP.

<https://doi.org/10.1371/journal.pone.0339578.t007>

**Table 8. New transcript analyses of ferroptosis-related genes.**

| Gene   | Isoform ID    | Postion                 | Class Code | Compare Ref     |
|--------|---------------|-------------------------|------------|-----------------|
| ASNS   | MSTRG.11960.3 | 7 [-]97852131-97872165  | j          | ENST00000175506 |
| SLC1A5 | MSTRG.6946.4  | 19 [-]46777211-46788594 | j          | ENST00000542575 |

<https://doi.org/10.1371/journal.pone.0339578.t008>

**Table 9. Molecular docking and non-covalent interaction.**

| Targets | Ligand | Free energy (kcal/M) | Ki/Kd ( $\mu$ M) | Interactions                             |
|---------|--------|----------------------|------------------|------------------------------------------|
| SLC1A5  | 6MF    | -8.40                | 0.69             | Hydrophobic Interaction                  |
| ASNS    | 6MF    | -6.90                | 8.64             | Hydrophobic Interaction<br>Hydrogen Bond |

Abbreviations: 6MF: 6-Methoxyflavone, Ki: inhibition constant, Kd: dissociation constant.

<https://doi.org/10.1371/journal.pone.0339578.t009>

in HeLa cell mitochondria (Fig 6F, 6G, 6J). The ASNS shRNA interference plasmid downregulated the mitochondrial superoxide levels upregulated by 6-methoxyflavone, but the difference was not significant (Fig 6H, 6J). The SLC1A5 shRNA interference plasmid significantly downregulated the mitochondrial superoxide levels upregulated by 6-methoxyflavone (Fig 6I, 6J). The core gene responsible for the induction of ferroptosis and the upregulation of mitochondrial superoxide in HeLa cells by 6-methoxyflavone was identified as SLC1A5.

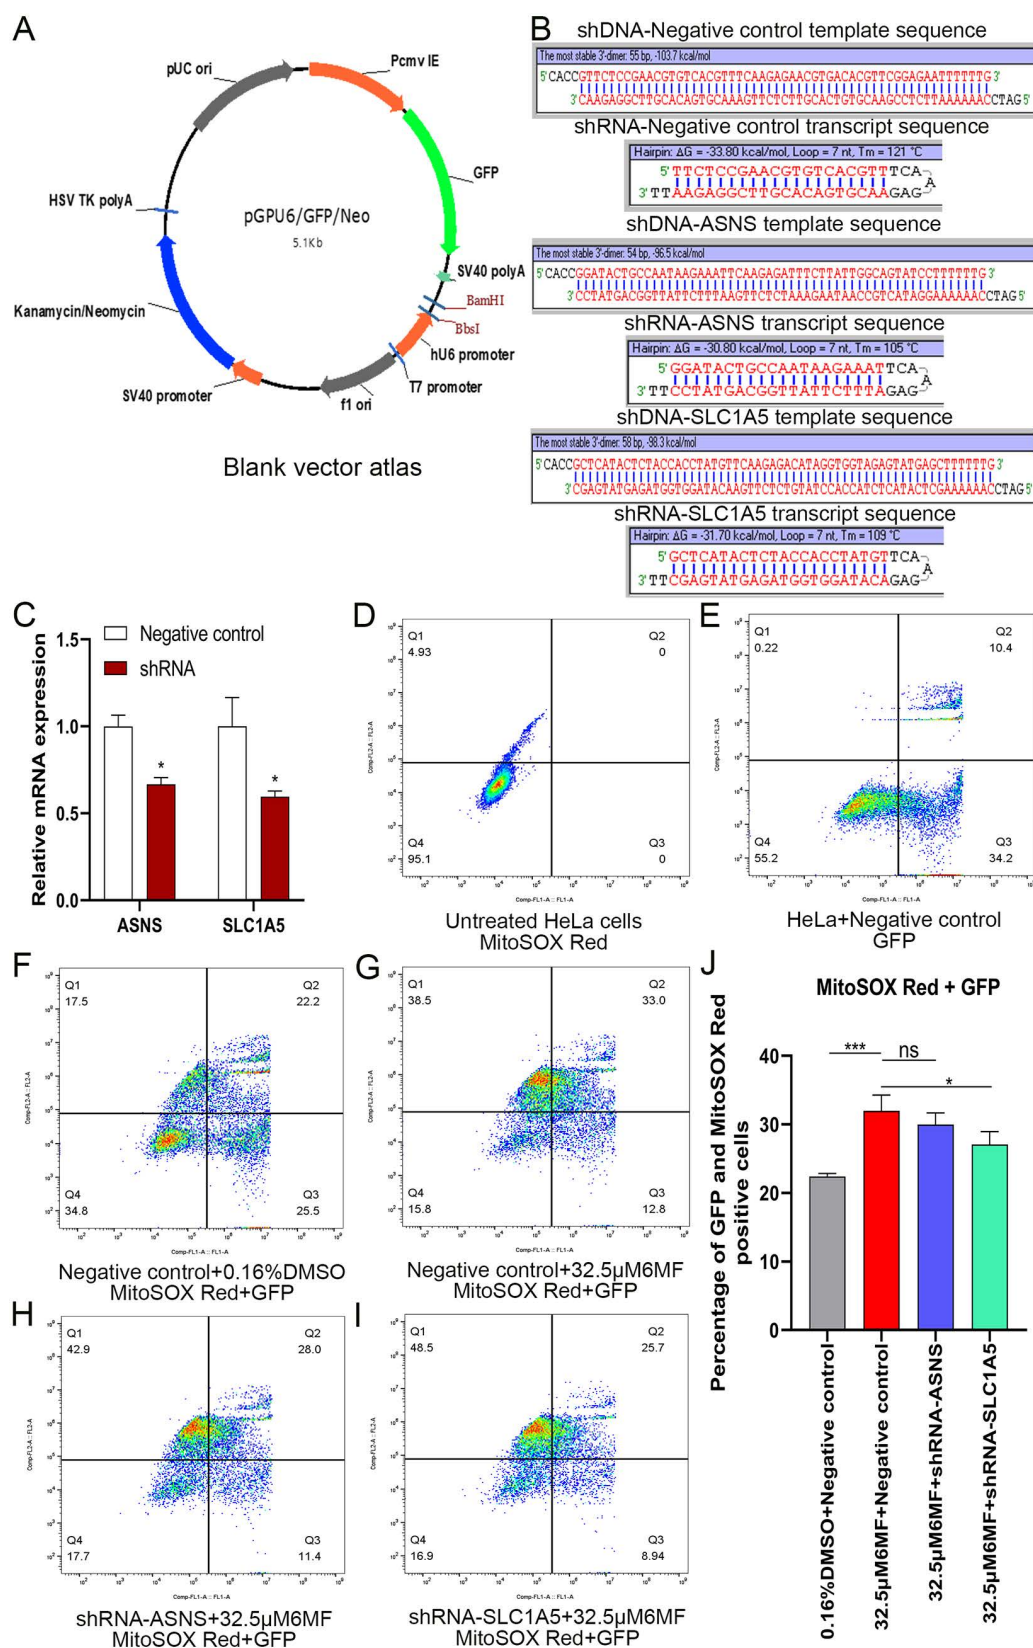

**Fig 6. Plasmid construction, cell transfection, and mitochondrial superoxide assay.** All assays were repeated at least thrice. \* $p < 0.05$ . \*\* $p < 0.01$ . ns: not significant. **A.** The pGPU6/GFP/Neo blank vector atlas. The vector contained the green fluorescent protein (GFP). **B.** The short hairpin RNA (shRNA) interference plasmid sequences. ASNS, SLC1A5, and negative control shRNA interference plasmids were obtained from Genepharma and transfected into HeLa cells using Lipo8000 reagent. **C.** The HeLa cells was digested and collected for quantitative polymerase chain reaction (qPCR) analysis to detect transfection efficiency. Statistical analysis was performed using paired t-tests. **D–J.** Cell transfection and mitochondrial superoxide assay. **D–I.** Flow cytometry images. The transfected cells were treated with 0.16% DMSO and 32.5  $\mu$ M 6-methoxyflavone for 24 hours. A flow cytometer was used to detect the fluorescence intensity in the FL1 and FL2 channels. Q1: GFP(-) and MitoSOX Red(+). Q2: GFP(+) and MitoSOX Red(+). Q3: GFP(+) and MitoSOX Red(-). Q4: GFP(-) and MitoSOX Red(-). **D–E.** The assay included two control groups: MitoSOX Red single fluorescence group of untreated HeLa cells, and GFP single fluorescence group of HeLa cells transfected with negative control shRNA. **F.** Treatment with Negative control and 0.16%DMSO. **G.** Treatment with Negative control and 32.5  $\mu$ M 6-methoxyflavone. **H.** Treatment with shRNA-ASNS and 32.5  $\mu$ M 6-methoxyflavone. **I.** Treatment with shRNA-SLC1A5 and 32.5  $\mu$ M 6-methoxyflavone. **J.** The histogram shows the percentage of GFP and MitoSOX Red positive cells in Q2 of Fig 6D–6I. Statistical analysis was performed using a one-way analysis of variance (ANOVA). A mitochondrial superoxide assay and a flow cytometer were used to detect the fluorescence intensity.

<https://doi.org/10.1371/journal.pone.0339578.g006>

## 4 Discussion

Induction of cancer cell ferroptosis is a promising cancer treatment strategy [5]. Ferroptosis is a potential target for cervical cancer treatment. This study aimed to elucidate the role and molecular mechanism of 6-methoxyflavone in inducing ferroptosis in HeLa cells, offering novel insights for potential therapeutic strategies in the management of cervical cancer. After treatment with 6-methoxyflavone, ferroptosis morphological changes at various stages were observed in HeLa cells, such as cytoplasmic membrane rupture, mitochondrial wrinkling, increased mitochondrial membrane density, reduced mitochondrial volume, and decreased or disappeared mitochondrial cristae. These TEM images indicated that 6-methoxyflavone markedly induced ferroptosis in HeLa cells. This effect was further validated through mitochondrial superoxide assay, and assessment of reduced and oxidized glutathione content.

Ferroptosis is closely associated with cancer metabolism [16] and affects cancer occurrence and progression. In our study, non-targeted metabolomics and targeted medical metabolomics indicated that 6-methoxyflavone was significantly correlated with ferroptosis. 6-Methoxyflavone significantly upregulated arachidonic acid and adrenic acid expression, whereas it significantly downregulated glutathione (reduced), glutathione (oxidized), glutamate, cysteine, and glutamine expression. The above metabolites are closely related to ferroptosis.

Transmission electron microscopy imaging, mitochondrion superoxide assay, GSH and GSSG content assay, non-targeted and targeted metabolomic analyses all indicated 6-Methoxyflavone induced ferroptosis in HeLa cells. Therefore, we further to explore the molecular mechanism of 6-methoxyflavone induced ferroptosis in HeLa cells. TMT proteomics, qPCR, western blot, PRM proteomics, alternative splicing, new transcript, functional domain, molecular docking, and non-covalent interaction analyses indicated that ASNS and SLC1A5 was the important gene biomarkers of 6-methoxyflavone-induced ferroptosis in HeLa cells. ASNS and SLC1A5 are associated with ferroptosis [21]. ASNS catalyzes asparagine synthesis from aspartate, and ASNS downregulation reprograms amino acid metabolism [39]. Under normal conditions, glutamine is essential for cell survival and growth. However, growth and survival factors induce ferroptosis during amino acid starvation. Supplementing glutamine during amino acid starvation increases intracellular reactive oxygen species production and induces ferroptosis in PC3 cells [40]. SLC1A5 overexpression induces glutamine uptake and decomposition, regulates alpha-ketoglutarate expression, leads to reactive oxygen species accumulation in the mitochondria, and induces ferroptosis [41].

To determine the specific functional roles of ASNS and SLC1A5, we performed loss-of-function genetic manipulation and mitochondrial superoxide assays. The SLC1A5 shRNA interference plasmid significantly downregulated the mitochondrial superoxide levels upregulated by 6-methoxyflavone. The core gene responsible for the induction of ferroptosis and the upregulation of mitochondrial superoxide in HeLa cells by 6-methoxyflavone was identified as SLC1A5. TMT and PRM proteomics analyses indicated that 6-methoxyflavone specifically interacted with the peptide sequence LGPEGELLIR of SLC1A5. Molecular docking analysis further confirmed a high binding affinity between 6-methoxyflavone and SLC1A5.

Additionally, non-covalent interaction analysis suggested that the interaction between 6-methoxyflavone and SLC1A5 was primarily driven by hydrophobic interactions.

Ferroptosis is closely associated with tumor progression; therefore, inhibiting ferroptosis can promote tumor progression [42]. In this study, 6-methoxyflavone induced ferroptosis in HeLa cells by markedly altering the expression of ferroptosis-related genes, proteins, and metabolites, thereby exerting anticancer effects. The core gene responsible for inducing ferroptosis was SLC1A5. However, this study was limited to cancer cells and did not include *in vivo* validation using animal models or patient samples. Additionally, this study assessed ferroptosis at 24 and 48 hours post-treatment. It would be valuable to evaluate the kinetics of ferroptosis over a broader time range, such as at 6 or 12 hours. This approach would provide a better understanding of the process dynamics and the rate at which ferroptosis is induced. Furthermore, the study does not include ferroptosis inhibitors to verify the specificity of 6-methoxyflavone's effect on ferroptosis. Incorporating these inhibitors would provide stronger evidence that 6-methoxyflavone induces ferroptosis rather than other forms of cell death. Future studies will incorporate additional animal models, a larger number of patient tissue samples, a wider range of time points, and assays involving ferroptosis inhibitors.

## 5 Conclusion

6-Methoxyflavone induces ferroptosis in HeLa cells by markedly altering ferroptosis-related genes, proteins, and metabolites expression, thus exerting anticancer effects. Molecular docking analyses showed that 6-methoxyflavone had the strongest affinity for SLC1A5. 6-Methoxyflavone induced ferroptosis in HeLa cells through the upregulation of SLC1A5 expression. The core gene responsible for the induction of ferroptosis and the upregulation of mitochondrial superoxide in HeLa cells by 6-methoxyflavone was identified as SLC1A5. TMT and PRM proteomics revealed that 6-methoxyflavone targeted the peptide segment sequence LGPEGELLIR of SLC1A5.

## Supporting information

**S1 File. Expression levels of reduced glutathione, glutamate, arachidonic acid, and DL-glutamine in non-targeted metabolomics (negative ion mode).** **Page 1.** The chromatogram and mass spectrogram of glutathione (reduced) in non-targeted metabolomics (negative ion mode) in the control group (0.16% DMSO). **Page 2.** The chromatogram and mass spectrogram of glutathione (reduced) in non-targeted metabolomics (negative ion mode) in the treat group (65  $\mu$ M). **Page 3.** The chromatogram and mass spectrogram of glutamate in non-targeted metabolomics (negative ion mode) in the control group (0.16% DMSO). **Page 4.** The chromatogram and mass spectrogram of glutamate in non-targeted metabolomics (negative ion mode) in the treat group (65  $\mu$ M). **Page 5.** The chromatogram and mass spectrogram of arachidonic acid in non-targeted metabolomics (negative ion mode) in the control group (0.16% DMSO). **Page 6.** The chromatogram and mass spectrogram of arachidonic acid in non-targeted metabolomics (negative ion mode) in the treat group (65  $\mu$ M). **Page 7.** The chromatogram and mass spectrogram of DL-glutamine in non-targeted metabolomics (negative ion mode) in the control group (0.16% DMSO). **Page 8.** The chromatogram and mass spectrogram of DL-glutamine in non-targeted metabolomics (negative ion mode) in the treat group (65  $\mu$ M).

(PDF)

**S2 File. Expression levels of reduced glutathione, oxidized glutathione, glutamate, and D-glutamine in non-targeted metabolomics (positive ion mode).** **Page 1.** The chromatogram and mass spectrogram of glutathione (reduced) in non-targeted metabolomics (positive ion mode) in the control group (0.16% DMSO). **Page 2.** The chromatogram and mass spectrogram of glutathione (reduced) in non-targeted metabolomics (positive ion mode) in the treat group (65  $\mu$ M). **Page 3.** The chromatogram and mass spectrogram of glutathione (oxidized) in non-targeted metabolomics (positive ion mode) in the control group (0.16% DMSO). **Page 4.** The chromatogram and mass spectrogram of glutathione (oxidized) in non-targeted metabolomics (positive ion mode) in the treat group (65  $\mu$ M). **Page 5.** The chromatogram and

mass spectrogram of glutamate in non-targeted metabolomics (positive ion mode) in the control group (0.16% DMSO).

**Page 6.** The chromatogram and mass spectrogram of glutamate in non-targeted metabolomics (positive ion mode) in the treat group (65  $\mu$ M). **Page 7.** The chromatogram and mass spectrogram of D-glutamine in non-targeted metabolomics (positive ion mode) in the control group (0.16% DMSO). **Page 8.** The chromatogram and mass spectrogram of D-glutamine in non-targeted metabolomics (positive ion mode) in the treat group (65  $\mu$ M).

(PDF)

**S3 File. Expression levels of reduced glutathione in targeted metabolomics. Page 1.** The chromatogram and mass spectrogram of glutathione (reduced) in targeted metabolomics (amide column) in the first control group (0.16% DMSO). **Page 2.** The chromatogram and mass spectrogram of glutathione (reduced) in targeted metabolomics (amide column) in the second control group (0.16% DMSO). **Page 3.** The chromatogram and mass spectrogram of glutathione (reduced) in targeted metabolomics (amide column) in the third control group (0.16% DMSO). **Page 4.** The chromatogram and mass spectrogram of glutathione (reduced) in targeted metabolomics (amide column) in the fourth control group (0.16% DMSO). **Page 5.** The chromatogram and mass spectrogram of glutathione (reduced) in targeted metabolomics (amide column) in the fifth control group (0.16% DMSO). **Page 6.** The chromatogram and mass spectrogram of glutathione (reduced) in targeted metabolomics (amide column) in the sixth control group (0.16% DMSO). **Page 7.** The chromatogram and mass spectrogram of glutathione (reduced) in targeted metabolomics (amide column) in the first treat group (65  $\mu$ M). **Page 8.** The chromatogram and mass spectrogram of glutathione (reduced) in targeted metabolomics (amide column) in the second treat group (65  $\mu$ M). **Page 9.** The chromatogram and mass spectrogram of glutathione (reduced) in targeted metabolomics (amide column) in the third treat group (65  $\mu$ M). **Page 10.** The chromatogram and mass spectrogram of glutathione (reduced) in targeted metabolomics (amide column) in the fourth treat group (65  $\mu$ M). **Page 11.** The chromatogram and mass spectrogram of glutathione (reduced) in targeted metabolomics (amide column) in the fifth treat group (65  $\mu$ M). **Page 12.** The chromatogram and mass spectrogram of glutathione (reduced) in targeted metabolomics (amide column) in the sixth treat group (65  $\mu$ M).

(PDF)

**S4 File. Expression levels of glutamate, arachidonic acid, adrenic acid, cystine, and glutamine in targeted metabolomics. Page 1.** The extracted ion chromatogram and mass spectrogram of glutamate in targeted metabolomics (amide column) in the control group (0.16% DMSO). **Page 2.** The extracted ion chromatogram and mass spectrogram of glutamate in targeted metabolomics (amide column) in the treat group (65  $\mu$ M). **Page 3.** The extracted ion chromatogram and mass spectrogram of arachidonic acid in targeted metabolomics (C18 column) in the control group (0.16% DMSO). **Page 4.** The extracted ion chromatogram and mass spectrogram of arachidonic acid in targeted metabolomics (C18 column) in the treat group (65  $\mu$ M). **Page 5.** The extracted ion chromatogram and mass spectrogram of adrenic acid in targeted metabolomics (C18 column) in the control group (0.16% DMSO). **Page 6.** The extracted ion chromatogram and mass spectrogram of adrenic acid in targeted metabolomics (C18 column) in the treat group (65  $\mu$ M). **Page 7.** The extracted ion chromatogram and mass spectrogram of cystine in targeted metabolomics (amide column) in the control group (0.16% DMSO). **Page 8.** The extracted ion chromatogram and mass spectrogram of cystine in targeted metabolomics (amide column) in the treat group (65  $\mu$ M). **Page 9.** The extracted ion chromatogram and mass spectrogram of glutamine in targeted metabolomics (amide column) in the control group (0.16% DMSO). **Page 10.** The extracted ion chromatogram and mass spectrogram of glutamine in targeted metabolomics (amide column) in the treat group (65  $\mu$ M).

(PDF)

**S5 File. Expression levels of ASNS and SLC1A5 in PRM quantitative detection. Page 1.** The chromatogram and mass spectrogram of ASNS(VDGEIILHLYDK) in PRM quantitative detection in the control group (0.16% DMSO). **Page 2.** The chromatogram and mass spectrogram of ASNS(VDGEIILHLYDK) in PRM quantitative detection in the treat group (65

μM). **Page 3.** The chromatogram and mass spectrogram of SLC1A5(EVLDSFLDLAR) in PRM quantitative detection in the control group (0.16% DMSO). **Page 4.** The chromatogram and mass spectrogram of SLC1A5(EVLDSFLDLAR) in PRM quantitative detection in the treat group (65 μM).

(PDF)

**S6 File. Alternative splicing analysis results of ASNS and SLC1A5 for each sample.**

(XLSX)

**S7 File. New transcript sequence file. Page 1.** New transcript sequence file of SLC1A5. **Page 2.** New transcript sequence file of ASNS.

(PDF)

**S8 File. Supporting Information file.** The original, uncropped, and unadjusted images underlying all blot results. **Page 1.** The original, uncropped, and unadjusted blot image of GAPDH in the first batch of samples. **Page 2.** The original, uncropped, and unadjusted blot image of ASNS in the first batch of samples. **Page 3.** The original, uncropped, and unadjusted blot image of PEX6 in the first batch of samples. **Page 4.** The original, uncropped, and unadjusted blot image of SCD in the first batch of samples. **Page 5.** The original, uncropped, and unadjusted blot image of SLC1A5 in the first batch of samples. **Page 6.** The original, uncropped, and unadjusted blot image of GAPDH in the second batch of samples. **Page 7.** The original, uncropped, and unadjusted blot image of GPT2 in the second batch of samples. **Page 8.** The original, uncropped, and unadjusted blot image of RRM2 in the second batch of samples. **Page 9.** The original, uncropped, and unadjusted blot image of TMSB4X in the second batch of samples. **Page 10.** The original, uncropped, and unadjusted blot image of VCP in the second batch of samples. **Page 11.** The original, uncropped, and unadjusted blot image of VDAC3 in the second batch of samples. **Page 12.** Prestained & Western Blot Marker.

(PDF)

## Acknowledgments

Thanks to the Shaanxi Engineering Research Center of Cell Immunology and Shaanxi Provincial the Key Laboratory of Infection and Immune Diseases.

## Author contributions

**Conceptualization:** Chaihong Zhang, Lihong Chen.

**Data curation:** Chaihong Zhang.

**Formal analysis:** Chaihong Zhang.

**Funding acquisition:** Chaihong Zhang.

**Investigation:** Chaihong Zhang, Lihong Chen.

**Methodology:** Chaihong Zhang.

**Project administration:** Chaihong Zhang, Lihong Chen.

**Resources:** Chaihong Zhang.

**Software:** Chaihong Zhang.

**Supervision:** Chaihong Zhang, Lihong Chen.

**Validation:** Chaihong Zhang, Lihong Chen.

**Visualization:** Chaihong Zhang.

**Writing – original draft:** Chaihong Zhang, Lihong Chen.

**Writing – review & editing:** Chaihong Zhang, Lihong Chen.

## References

1. World Health Organization international agency for research on cancer, Data visualization tools for exploring the global cancer burden in 2022. 2024 (accessed 10 March 2024). <https://gco.iarc.who.int/today>
2. Ru J, Li P, Wang J, Zhou W, Li B, Huang C, et al. TCMSP: a database of systems pharmacology for drug discovery from herbal medicines. *J Cheminform*. 2014;6:13. <https://doi.org/10.1186/1758-2946-6-13> PMID: [24735618](https://pubmed.ncbi.nlm.nih.gov/24735618/)
3. Kinjo J, Nakano D, Fujioka T, Okabe H. Screening of promising chemotherapeutic candidates from plants extracts. *J Nat Med*. 2016;70(3):335–60. <https://doi.org/10.1007/s11418-016-0992-2> PMID: [27086008](https://pubmed.ncbi.nlm.nih.gov/27086008/)
4. Gong Y, Luo G, Zhang S, Chen Y, Hu Y. Transcriptome sequencing analysis reveals miR-30c-5p promotes ferroptosis in cervical cancer and inhibits growth and metastasis of cervical cancer xenografts by targeting the METTL3/KRAS axis. *Cell Signal*. 2024;117:111068. <https://doi.org/10.1016/j.cellsig.2024.111068> PMID: [38286198](https://pubmed.ncbi.nlm.nih.gov/38286198/)
5. Luo Y, Chen Y, Jin H, Hou B, Li H, Li X, et al. The suppression of cervical cancer ferroptosis by macrophages: The attenuation of ALOX15 in cancer cells by macrophages-derived exosomes. *Acta Pharm Sin B*. 2023;13(6):2645–62. <https://doi.org/10.1016/j.apsb.2023.03.025> PMID: [37425043](https://pubmed.ncbi.nlm.nih.gov/37425043/)
6. Zhao M-Y, Liu P, Sun C, Pei L-J, Huang Y-G. Propofol Augments Paclitaxel-Induced Cervical Cancer Cell Ferroptosis In Vitro. *Front Pharmacol*. 2022;13:816432. <https://doi.org/10.3389/fphar.2022.816432> PMID: [35517791](https://pubmed.ncbi.nlm.nih.gov/35517791/)
7. Jin N, Wang Z, Yin C, Bu W, Jin N, Ou L, et al. Novel Carbon Quantum Dots Precisely Trigger Ferroptosis in Cancer Cells through Antioxidant Inhibition Synergistic Nanocatalytic Activity. *ACS Appl Mater Interfaces*. 2024;16(29):37456–67. <https://doi.org/10.1021/acsami.4c04307> PMID: [39007694](https://pubmed.ncbi.nlm.nih.gov/39007694/)
8. Zeng L, Zhao W, Han T, Qing F, He Z, Zhao Q, et al. Ropivacaine prompts ferroptosis to enhance the cisplatin-sensitivity of human colorectal cancer through SIRT1/Nrf2 signaling pathway. *Chem Biol Interact*. 2024;400:111163. <https://doi.org/10.1016/j.cbi.2024.111163> PMID: [39053794](https://pubmed.ncbi.nlm.nih.gov/39053794/)
9. Wang Y, Guan W-X, Zhou Y, Zhang X-Y, Zhao H-J. Red ginseng polysaccharide promotes ferroptosis in gastric cancer cells by inhibiting PI3K/Akt pathway through down-regulation of AQP3. *Cancer Biol Ther*. 2024;25(1):2284849. <https://doi.org/10.1080/15384047.2023.2284849> PMID: [38051132](https://pubmed.ncbi.nlm.nih.gov/38051132/)
10. Lai J-Q, Zhao L, Hong C, Zou Q-M, Su J-X, Li S-J, et al. Baicalein triggers ferroptosis in colorectal cancer cells via blocking the JAK2/STAT3/GPX4 axis. *Acta Pharmacol Sin*. 2024;45(8):1715–26. <https://doi.org/10.1038/s41401-024-01258-z> PMID: [38684798](https://pubmed.ncbi.nlm.nih.gov/38684798/)
11. Sun L, Zhang H, Gao P. Metabolic reprogramming and epigenetic modifications on the path to cancer. *Protein Cell*. 2022;13(12):877–919. <https://doi.org/10.1007/s13238-021-00846-7> PMID: [34050894](https://pubmed.ncbi.nlm.nih.gov/34050894/)
12. Parida PK, Marquez-Palencia M, Ghosh S, Khandelwal N, Kim K, Nair V, et al. Limiting mitochondrial plasticity by targeting DRP1 induces metabolic reprogramming and reduces breast cancer brain metastases. *Nat Cancer*. 2023;4(6):893–907. <https://doi.org/10.1038/s43018-023-00563-6> PMID: [37248394](https://pubmed.ncbi.nlm.nih.gov/37248394/)
13. Lin Y, Zhou X, Ni Y, Zhao X, Liang X. Metabolic reprogramming of the tumor immune microenvironment in ovarian cancer: A novel orientation for immunotherapy. *Front Immunol*. 2022;13:1030831. <https://doi.org/10.3389/fimmu.2022.1030831> PMID: [36311734](https://pubmed.ncbi.nlm.nih.gov/36311734/)
14. Yang Y-F, Li C-H, Cai H-Y, Lin B-S, Kim C-H, Chang Y-C. Application of Metabolic Reprogramming to Cancer Imaging and Diagnosis. *Int J Mol Sci*. 2022;23(24):15831. <https://doi.org/10.3390/ijms232415831> PMID: [36555470](https://pubmed.ncbi.nlm.nih.gov/36555470/)
15. Pateras IS, Williams C, Giannou DD, Margetis AT, Avgeris M, Rousakis P, et al. Short term starvation potentiates the efficacy of chemotherapy in triple negative breast cancer via metabolic reprogramming. *J Transl Med*. 2023;21(1):169. <https://doi.org/10.1186/s12967-023-03935-9> PMID: [36869333](https://pubmed.ncbi.nlm.nih.gov/36869333/)
16. Mao C, Wang M, Zhuang L, Gan B. Metabolic cell death in cancer: ferroptosis, cuproptosis, disulfidoptosis, and beyond. *Protein Cell*. 2024;15(9):642–60. <https://doi.org/10.1093/procel/pwae003> PMID: [38428031](https://pubmed.ncbi.nlm.nih.gov/38428031/)
17. Xu W, Ding J, Li B, Sun T, You X, He Q, et al. Effects of icariin and curcumin on autophagy, ferroptosis, and lipid metabolism based on miR-7/mTOR/SREBP1 pathway on prostate cancer. *Biofactors*. 2023;49(2):438–56. <https://doi.org/10.1002/biof.1927> PMID: [36585763](https://pubmed.ncbi.nlm.nih.gov/36585763/)
18. Ashburner M, Ball CA, Blake JA, Botstein D, Butler H, Cherry JM, et al. Gene ontology: tool for the unification of biology. The Gene Ontology Consortium. *Nat Genet*. 2000;25(1):25–9. <https://doi.org/10.1038/75556> PMID: [10802651](https://pubmed.ncbi.nlm.nih.gov/10802651/)
19. Götz S, García-Gómez JM, Terol J, Williams TD, Nagaraj SH, Nueda MJ, et al. High-throughput functional annotation and data mining with the Blast2GO suite. *Nucleic Acids Res*. 2008;36(10):3420–35. <https://doi.org/10.1093/nar/gkn176> PMID: [18445632](https://pubmed.ncbi.nlm.nih.gov/18445632/)
20. Kanehisa M, Araki M, Goto S, Hattori M, Hirakawa M, Itoh M, et al. KEGG for linking genomes to life and the environment. *Nucleic Acids Res*. 2008;36(Database issue):D480–4. <https://doi.org/10.1093/nar/gkm882> PMID: [18077471](https://pubmed.ncbi.nlm.nih.gov/18077471/)
21. Zhou N, Yuan X, Du Q, Zhang Z, Shi X, Bao J, et al. FerrDb V2: update of the manually curated database of ferroptosis regulators and ferroptosis-disease associations. *Nucleic Acids Res*. 2023;51(D1):D571–82. <https://doi.org/10.1093/nar/gkac935> PMID: [36305834](https://pubmed.ncbi.nlm.nih.gov/36305834/)
22. MacLean B, Tomazela DM, Shulman N, Chambers M, Finney GL, Frewen B, et al. Skyline: an open source document editor for creating and analyzing targeted proteomics experiments. *Bioinformatics*. 2010;26(7):966–8. <https://doi.org/10.1093/bioinformatics/btq054> PMID: [20147306](https://pubmed.ncbi.nlm.nih.gov/20147306/)

23. Jones P, Binns D, Chang H-Y, Fraser M, Li W, McAnulla C, et al. InterProScan 5: genome-scale protein function classification. *Bioinformatics*. 2014;30(9):1236–40. <https://doi.org/10.1093/bioinformatics/btu031> PMID: [24451626](#)
24. Finn RD, Mistry J, Schuster-Böckler B, Griffiths-Jones S, Hollich V, Lassmann T, et al. Pfam: clans, web tools and services. *Nucleic Acids Res*. 2006;34(Database issue):D247–51. <https://doi.org/10.1093/nar/gkj149> PMID: [16381856](#)
25. Florea L, Song L, Salzberg SL. Thousands of exon skipping events differentiate among splicing patterns in sixteen human tissues. *F1000Res*. 2013;2:188. <https://doi.org/10.12688/f1000research.2-188.v2> PMID: [24555089](#)
26. Perteau M, Perteau GM, Antonescu CM, Chang T-C, Mendell JT, Salzberg SL. StringTie enables improved reconstruction of a transcriptome from RNA-seq reads. *Nat Biotechnol*. 2015;33(3):290–5. <https://doi.org/10.1038/nbt.3122> PMID: [25690850](#)
27. Perteau G, Perteau M. GFF Utilities: GffRead and GffCompare. *F1000Res*. 2020;9:ISCB Comm J-304. <https://doi.org/10.12688/f1000research.23297.2> PMID: [32489650](#)
28. Kim S, Chen J, Cheng T, Gindulyte A, He J, He S, et al. PubChem in 2021: new data content and improved web interfaces. *Nucleic Acids Res*. 2021;49(D1):D1388–95. <https://doi.org/10.1093/nar/gkaa971> PMID: [33151290](#)
29. Jumper J, Evans R, Pritzel A, Green T, Figurnov M, Ronneberger O, et al. Highly accurate protein structure prediction with AlphaFold. *Nature*. 2021;596(7873):583–9. <https://doi.org/10.1038/s41586-021-03819-2> PMID: [34265844](#)
30. Tunyasuvunakool K, Adler J, Wu Z, Green T, Zielinski M, Židek A, et al. Highly accurate protein structure prediction for the human proteome. *Nature*. 2021;596(7873):590–6. <https://doi.org/10.1038/s41586-021-03828-1> PMID: [34293799](#)
31. Trott O, Olson AJ. AutoDock Vina: improving the speed and accuracy of docking with a new scoring function, efficient optimization, and multithreading. *J Comput Chem*. 2010;31(2):455–61. <https://doi.org/10.1002/jcc.21334> PMID: [19499576](#)
32. Adasme MF, Linnemann KL, Bolz SN, Kaiser F, Salentin S, Haupt VJ, et al. PLIP 2021: expanding the scope of the protein-ligand interaction profiler to DNA and RNA. *Nucleic Acids Res*. 2021;49(W1):W530–4. <https://doi.org/10.1093/nar/gkab294> PMID: [33950214](#)
33. Guan D, Li C, Lv X, Yang Y. Pseudolaric acid B inhibits PAX2 expression through Wnt signaling and induces BAX expression, therefore promoting apoptosis in HeLa cervical cancer cells. *J Gynecol Oncol*. 2019;30(5):e77. <https://doi.org/10.3802/jgo.2019.30.e77> PMID: [31328459](#)
34. Miyake S, Murai S, Kakuta S, Uchiyama Y, Nakano H. Identification of the hallmarks of necroptosis and ferroptosis by transmission electron microscopy. *Biochem Biophys Res Commun*. 2020;527(3):839–44. <https://doi.org/10.1016/j.bbrc.2020.04.127> PMID: [32430176](#)
35. Yang L, Yao C, Su Z, Fang Y, Pandey NK, Amador E, et al. Combination of disulfiram and Copper-Cysteamine nanoparticles induces mitochondria damage and promotes apoptosis in endometrial cancer. *Bioact Mater*. 2024;36:96–111. <https://doi.org/10.1016/j.bioactmat.2024.02.009> PMID: [38440322](#)
36. Degenhardt K, Mathew R, Beaudoin B, Bray K, Anderson D, Chen G, et al. Autophagy promotes tumor cell survival and restricts necrosis, inflammation, and tumorigenesis. *Cancer Cell*. 2006;10(1):51–64. <https://doi.org/10.1016/j.ccr.2006.06.001> PMID: [16843265](#)
37. Lin H, Zhu S, Chen Y, Lu J, Xie C, Liao C, et al. Targeting cTRIP12 counteracts ferroptosis resistance and augments sensitivity to immunotherapy in pancreatic cancer. *Drug Resist Updat*. 2025;81:101240. <https://doi.org/10.1016/j.drug.2025.101240> PMID: [40154160](#)
38. Feng L, Sang J, Zhu H, Hu Y, Liu B, He G, et al. Tumor Microenvironment-Activated Fe<sup>3+</sup>-Doped Dendritic Mesoporous Organosilica Nanocomposites as Ferroptosis Inducers for Enhanced Immunotherapy. *Adv Mater*. 2025;37(45):e10010. <https://doi.org/10.1002/adma.202510010> PMID: [40855985](#)
39. Wang M, Li J, Yang X, Yan Q, Wang H, Xu X, et al. Targeting TLK2 inhibits the progression of gastric cancer by reprogramming amino acid metabolism through the mTOR/ASNS axis. *Cancer Gene Ther*. 2023;30(11):1485–97. <https://doi.org/10.1038/s41417-023-00653-8> PMID: [37542132](#)
40. Ogor P, Yoshida T, Koike M, Kakizuka A. VCP relocalization limits mitochondrial activity, GSH depletion and ferroptosis during starvation in PC3 prostate cancer cells. *Genes Cells*. 2021;26(8):570–82. <https://doi.org/10.1111/gtc.12872> PMID: [34033175](#)
41. Luo M, Wu L, Zhang K, Wang H, Zhang T, Gutierrez L, et al. miR-137 regulates ferroptosis by targeting glutamine transporter SLC1A5 in melanoma. *Cell Death Differ*. 2018;25(8):1457–72. <https://doi.org/10.1038/s41418-017-0053-8> PMID: [29348676](#)
42. Cao W, He Y, Lan J, Luo S, Sun B, Xiao C, et al. FOXP3 promote the progression of glioblastoma via inhibiting ferroptosis mediated by linc00857/miR-1290/GPX4 axis. *Cell Death Dis*. 2024;15(4):239. <https://doi.org/10.1038/s41419-024-06619-4> PMID: [38561331](#)
